# Supplementary material for: Public acceptability of the UK Soft Drinks Industry Levy: repeat cross-sectional analysis of the International Food Policy Study (2017–2019)
Source: PubMed Central journal article supplement (PMC8475144; doi:10.1136/bmjopen-2021-051677), 2021-09-24
Supplement: bmjopen-2021-051677.draft_revisions.pdf [file bmjopen-2021-051677.draft_revisions.pdf]

# BMJ Open

BMJ Open is committed to open peer review. As part of this commitment we make the peer review history of every article we publish publicly available.

When an article is published we post the peer reviewers' comments and the authors' responses online. We also post the versions of the paper that were used during peer review. These are the versions that the peer review comments apply to.

The versions of the paper that follow are the versions that were submitted during the peer review process. They are not the versions of record or the final published versions. They should not be cited or distributed as the published version of this manuscript.

BMJ Open is an open access journal and the full, final, typeset and author-corrected version of record of the manuscript is available on our site with no access controls, subscription charges or pay-per-view fees (<http://bmjopen.bmj.com>).

If you have any questions on BMJ Open's open peer review process please email [info.bmjopen@bmj.com](mailto:info.bmjopen@bmj.com)

# BMJ Open

**CHANGE IN PUBLIC ACCEPTABILITY OF THE UK SOFT DRINKS INDUSTRY LEVY IN UK ADULTS FROM BEFORE TO AFTER IMPLEMENTATION: REPEAT CROSS-SECTIONAL ANALYSIS OF THE INTERNATIONAL FOOD POLICY STUDY (2017-2019)**

|                               |                                                                                                                                                                                                                                                                                                                                                                                                                               |
|-------------------------------|-------------------------------------------------------------------------------------------------------------------------------------------------------------------------------------------------------------------------------------------------------------------------------------------------------------------------------------------------------------------------------------------------------------------------------|
| Journal:                      | <i>BMJ Open</i>                                                                                                                                                                                                                                                                                                                                                                                                               |
| Manuscript ID                 | bmjopen-2021-051677                                                                                                                                                                                                                                                                                                                                                                                                           |
| Article Type:                 | Original research                                                                                                                                                                                                                                                                                                                                                                                                             |
| Date Submitted by the Author: | 12-Apr-2021                                                                                                                                                                                                                                                                                                                                                                                                                   |
| Complete List of Authors:     | Adams, J; University of Cambridge, MRC Epidemiology Unit<br>Pell, David; University of Cambridge, MRC Epidemiology Unit; NHS RightCare, Midlands Region<br>Penney, Tarra; York University Faculty of Health, School of Global Health<br>Hammond, D; University of Waterloo, School of Public Health<br>Vanderlee, Lana; Universite Laval, Ecole de Nutrition<br>White, Martin; University of Cambridge, MRC Epidemiology Unit |
| Keywords:                     | NUTRITION & DIETETICS, PUBLIC HEALTH, Health policy < HEALTH SERVICES ADMINISTRATION & MANAGEMENT                                                                                                                                                                                                                                                                                                                             |
|                               |                                                                                                                                                                                                                                                                                                                                                                                                                               |

SCHOLARONE™  
Manuscripts

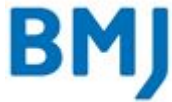

I, the Submitting Author has the right to grant and does grant on behalf of all authors of the Work (as defined in the below author licence), an exclusive licence and/or a non-exclusive licence for contributions from authors who are: i) UK Crown employees; ii) where BMJ has agreed a CC-BY licence shall apply, and/or iii) in accordance with the terms applicable for US Federal Government officers or employees acting as part of their official duties; on a worldwide, perpetual, irrevocable, royalty-free basis to BMJ Publishing Group Ltd ("BMJ") its licensees and where the relevant Journal is co-owned by BMJ to the co-owners of the Journal, to publish the Work in this journal and any other BMJ products and to exploit all rights, as set out in our [licence](#).

The Submitting Author accepts and understands that any supply made under these terms is made by BMJ to the Submitting Author unless you are acting as an employee on behalf of your employer or a postgraduate student of an affiliated institution which is paying any applicable article publishing charge ("APC") for Open Access articles. Where the Submitting Author wishes to make the Work available on an Open Access basis (and intends to pay the relevant APC), the terms of reuse of such Open Access shall be governed by a Creative Commons licence – details of these licences and which [Creative Commons](#) licence will apply to this Work are set out in our licence referred to above.

Other than as permitted in any relevant BMJ Author's Self Archiving Policies, I confirm this Work has not been accepted for publication elsewhere, is not being considered for publication elsewhere and does not duplicate material already published. I confirm all authors consent to publication of this Work and authorise the granting of this licence.

1  
2  
3 **CHANGE IN PUBLIC ACCEPTABILITY OF THE UK SOFT DRINKS INDUSTRY LEVY IN UK ADULTS FROM**  
4 **BEFORE TO AFTER IMPLEMENTATION: REPEAT CROSS-SECTIONAL ANALYSIS OF THE INTERNATIONAL**  
5 **FOOD POLICY STUDY (2017-2019)**  
6  
7

8  
9 *Jean Adams,<sup>1\*</sup> David Pell,<sup>1,2†</sup> Tarra Penney,<sup>3</sup> David Hammond,<sup>4</sup> Lana Vanderlee,<sup>5</sup> Martin White<sup>1</sup>*

10  
11 <sup>1</sup>Centre for Diet & Activity Research, MRC Epidemiology Unit, University of Cambridge, Cambridge, UK

12  
13  
14 <sup>2</sup>RightCare, Midlands Region, NHS England, Newcastle upon Tyne, UK

15  
16 <sup>3</sup>School of Global Health, York University, Toronto, Ontario, Canada

17  
18 <sup>4</sup>School of Public Health, University of Waterloo, Waterloo, Ontario, Canada

19  
20  
21 <sup>5</sup>Centre NUTRISS (Nutrition, Santé et Société), École de Nutrition, Université Laval, Quebec, Quebec,  
22  
23 Canada

24  
25 <sup>†</sup>DP was affiliation 1 when this work was originally conceived, but is now affiliation 2

26  
27  
28 **\*Corresponding author:** Jean Adams, Centre for Diet & Activity Research, MRC Epidemiology Unit,  
29 University of Cambridge School of Clinical Medicine, Box 285 Institute of Metabolic Science, Cambridge  
30 Biomedical Campus, Cambridge, UK, CB2 0QQ. Email: [jma79@medschl.cam.ac.uk](mailto:jma79@medschl.cam.ac.uk) Tel: +44 (0) 1223 769  
31  
32  
33 142

34  
35 **Main text word count:** 3493  
36  
37  
38  
39  
40  
41  
42  
43  
44  
45  
46  
47  
48  
49  
50  
51  
52  
53  
54  
55  
56  
57  
58  
59  
60

**ABSTRACT**

**Objectives** To determine whether public acceptability, in terms of both support for and perceived effectiveness of, the UK Soft Drinks Industry Levy (SDIL) changed between four months prior to, and 8 and 20 months after, implementation.

**Design** Repeat cross-sectional on-line survey.

**Setting** UK

**Participants** UK respondents to the International Food Policy Study aged 18-64 years who provided information on all variables of interest in November-December 2017 (4 months prior to SDIL implementation), 2018 (8 months after) or 2019 (20 months after; n=10,284).

**Outcome measures** Self-reported support for, and perceived effectiveness of, the SDIL.

**Results** The adjusted logistic regression model predicted that 70% (95% CI: 68 to 72) of participants supported the SDIL in 2017, 68% (95% CI: 67 to 70) in 2018, and 68% (95% CI: 66 to 70) in 2019. There was no evidence of a difference in support in 2018 vs 2017 (odds ratio (OR): 0.93; 95% confidence intervals (CI): 0.81 to 1.05); or in 2019 vs 2017 (OR: 0.90; 95% CI (0.78 to 1.03)). The adjusted logistic regression model predicted that 72% (95% CI: 70 to 74) of participants perceived the SDIL to be effective in 2017, 67% (95% CI: 65 to 69) in 2018, and 67% (95% CI: 64 to 69) in 2019. There was evidence that perceived effectiveness decreased a small amount between 2018 vs 2017 (OR: 0.78; 95% CI: 0.69 to 0.88). The difference in 2019 vs 2017 was similar.

**Conclusions** There was high support for the SDIL amongst UK adults and this did not change between 4 months before implementation and 8 or 20 months after. Whilst perceived effectiveness remained high, there was evidence that this decreased slightly after implementation in 2018, but no further in 2019. Greater understanding of influences on public acceptability of effective structural public health interventions is required.

**Keywords:** taxation, soda tax, public health, attitudes, nutrition & dietetics

## ARTICLE SUMMARY

### Strengths and limitations of the study

- We used three annual waves of a large, population-based survey (n=10,284).
- We were careful to present the Soft Drinks Industry Levy as an intervention targeted at manufacturers rather than consumers, with revenues ear-marked for health-promotion activities.
- This is a repeat cross-sectional design with measures pre- and post-implementation
- Whilst all measures have strong face validity, we have not explored other aspects of validity or reliability of any of the measures used; in many cases it would be hard to know what the 'gold standard' measure should be.

## INTRODUCTION

Taxes on sugar sweetened beverages (SSBs) are recommended by the World Health Organisation to reduce sugar consumption and prevent non-communicable diseases.[1] Systematic review evidence suggests that SSB taxes lead to reductions in SSB purchasing and consumption, but there is substantial heterogeneity in effect sizes[2] and tax design.[3] Better understanding of the contextual factors that influence the effectiveness of SSB taxes may enable taxes to be better tailored to context.[4] Such contextual factors may include public acceptability of SSB taxes.

By their nature, regulatory policies such as SSB taxes require political support for implementation. Political support is, in turn, likely to be influenced by public acceptability. As well as influencing implementation, public acceptability may also influence the effectiveness and longevity of SSB taxes.[5] For example, if price increases following an SSB tax are not acceptable to the public, then they may travel to buy SSBs in un-taxed areas (so called cross-border shopping).[3] Further, a number of food taxes have been repealed after implementation, in part due to public backlash.[6-8] This makes it important to understand how public acceptability of SSB taxes changes after implementation.

Public acceptability of a policy reflects both public support for that policy and perceptions of how effective the policy may be.[9] Public support for hypothetical SSB taxes ranges from around 35-60%.[10-27] A recent systematic review reported a pooled figure for support of 42% (95% confidence interval (CI): 38 to 47).[9] Associations between support and variables such as age, SSB consumption and socio-economic position are inconsistent.[10 12 15 17 23-25 27-29] However, support is consistently higher when it is clear that revenue raised will be used for health promotion activities, such as subsidies on healthy food.[9 18 19 26 29 30]

Perceived effectiveness of SSB taxes has been less studied than public support.[9 17 29] However, in a systematic review, pooled estimates were that 39% (95% CI 26 to 54) of the public believe SSB taxes reduce purchases and consumption, and 40% (95% CI 29 to 54) believe that they impact on health-related outcomes.[9] A perception that SSB taxes are unlikely to be effective is a common explanation for low public support in qualitative studies.[9 16 18]

Most previous work on public acceptability of SSB taxes has focused on hypothetical taxes. A systematic review of support for government interventions to change health-related behaviours (that did not include any studies on SSB taxes) found that support tends to be higher for implemented, rather than

1  
2  
3 hypothetical, policies.[31] Similarly, perceived effectiveness may be influenced by whether respondents  
4 are reporting on a hypothetical or implemented tax.  
5

6  
7 We are aware of four studies on public acceptability of implemented SSB taxes. One study of the French  
8 excise tax on sweetened beverages found 49% of the public supported the tax and 58% believed it  
9 would improve health.[29] An international study exploring public support for a range of dietary public  
10 health policies in 2017 included data from Mexico, where an SSB tax was implemented in 2014. Whilst  
11 support for an SSB tax was higher in Mexico than other countries (54% vs 30-49%), the same was true  
12 for many other policies studied.[27] Two studies have focused on the UK Soft Drinks Industry Levy (SDIL;  
13 described in Box 1).[32 33] Our previous population-based survey conducted before implementation  
14 (i.e. the 2017 data presented in the current work), found that 70% of UK adults supported the SDIL and  
15 71% thought it would be effective.[32] Finally, a survey of parents of children aged 5-11 years conducted  
16 soon after implementation found that 57% supported the aims of the SDIL.[33] We are not aware of any  
17 study exploring change in public acceptability of SSB taxes from before to after implementation.  
18  
19

20  
21 Our aim was to determine whether public acceptability, in terms of both support for, and perceived  
22 effectiveness of, the SDIL changed between four months prior to and 20 months after implementation.  
23  
24  
25

26  
27  
28  
29  
30  
31 **Box 1 – Key characteristics of the UK Soft Drinks Industry Levy[34-37]**

- 32  
33  
34  
35  
36  
37  
38  
39  
40  
41  
42  
43  
44  
45  
46  
47  
48  
49  
50  
51  
52  
53  
54  
55  
56  
57  
58  
59  
60
- Levied on companies importing or manufacturing SSBs, not consumers
  - Intentional two-year delay between announcement (March 2016) and implementation (April 2018) to give manufacturers time to adapt by developing lower sugar products
  - Tiered with eligible drinks containing  $\geq 8\text{g}$  of sugar per 100ml charged £0.24 [€0.27, US\$0.33]/litre, those containing  $\geq 5\text{g}$  but  $< 8\text{g}$  charged £0.18 [€0.20, US\$0.24]/litre, and those containing  $< 5\text{g}$  not charged
  - Exemptions for pure fruit juices, milk-based drinks and a number of other smaller categories
  - Announcement included a statement that revenue raised would be spent on school sport and school breakfast clubs
  - Associated with substantial reformulation of the UK soft drinks market to reduce sugar content
  - Associated with complex changes in SSB prices with some categories increasing in price and others decreasing
  - Associated with no change in volume of all drinks purchased, but a reduction in sugar purchased from drinks



## **METHODS**

We used repeat cross-sectional survey data from the International Food Policy Study (IFPS). We conducted both unadjusted analyses and analyses adjusted for a number of socio-demographic and psychological variables that are potential, or previously reported, correlates of support for, and perceived effectiveness of, the SDIL.

### **Sampling, recruitment and data collection**

Data were from UK participants in the 2017, 2018 and 2019 waves of IFPS. This is an annual repeat cross-sectional survey conducted in Australia, Canada, Mexico, the UK and the USA with an annual, pragmatic, recruitment target of 4000 adults per country per wave. Data were collected via self-completed web surveys in November-December each year, representing 4-5 months before implementation, but 19-20 months after announcement (2017); 7-8 months after implementation (2018) and 19-20 months after implementation (2019). Respondents were recruited through Nielsen Consumer Insights Global Panel and their partners' panels. Email invitations with unique survey access links were sent to a random sample of panellists within each country after targeting for demographics; panellists known to be ineligible were not invited. Potential respondents were screened for eligibility and quota requirements based on age and sex.

Respondents provided informed consent prior to completing the survey and received remuneration in accordance with their panel's usual incentive structure (e.g. points-based or monetary rewards, or chances to win prizes). A full description of the study methods can be found at [www.foodpolicystudy.com/methods](http://www.foodpolicystudy.com/methods).

### **Inclusion criteria**

We included in the analysis UK resident participants in the 2017, 2018 and 2019 IFPS waves who met the following criteria: were aged 18-64 years, provided information on sex at birth and age, and passed data quality checks (provided a valid response to a data quality question; took at least 15 minutes to complete the survey; and provided a valid response to at least three of 20 open-ended measures).

### **Variables used in the analysis**

The variables used in the analysis, the survey items from which they were derived, response options and how response options were collapsed for analysis are described in Table 1.

**Table 1. Description of items and response options used in the analysis**

| Concept            | Item wording (where applicable)                                                                                                                                                                                                                       | Response options                                                                                                                                                |                   |
|--------------------|-------------------------------------------------------------------------------------------------------------------------------------------------------------------------------------------------------------------------------------------------------|-----------------------------------------------------------------------------------------------------------------------------------------------------------------|-------------------|
|                    |                                                                                                                                                                                                                                                       | All                                                                                                                                                             | Used in analysis  |
| Age                | How old are you?                                                                                                                                                                                                                                      | In years                                                                                                                                                        | In years          |
| Sex                | What sex were you assigned at birth, meaning on your original birth certificate?                                                                                                                                                                      | Female                                                                                                                                                          | Female            |
|                    |                                                                                                                                                                                                                                                       | Male                                                                                                                                                            | Male              |
| Education          | What is the highest level of education you have completed?                                                                                                                                                                                            | Qualifications not listed below, free-text equivalents, Don't Know, Refuse to answer                                                                            | School level      |
|                    |                                                                                                                                                                                                                                                       | NVQ Level 4-5, HNC, HND, RSA Higher Diploma, BTEC Higher Level, Degree, Higher Degree, free-text equivalents                                                    | Post school level |
| Income sufficiency | How easy is it to make ends meet?                                                                                                                                                                                                                     | Neither easy nor difficult, Difficult, Very difficult, Don't know, Refuse to answer                                                                             | Not easy          |
|                    |                                                                                                                                                                                                                                                       | Very easy, Easy                                                                                                                                                 | Easy              |
| Children           | Do you have any children (including step-children or adopted children) under the age of 18?                                                                                                                                                           | No, Don't know, Refuse to answer                                                                                                                                | No                |
|                    |                                                                                                                                                                                                                                                       | Yes                                                                                                                                                             | Yes               |
| SSB consumption    | [Calculated from Beverage Frequency Questionnaire: reported consumption over last 7 days]                                                                                                                                                             | Any consumption of non-diet Fizzy drinks, Sweetened fruit juice drinks, Regular sports drinks, Regular energy drinks, or Spirits with mixers that have calories | Consumers         |
|                    |                                                                                                                                                                                                                                                       | No consumption of above                                                                                                                                         | Non-consumers     |
| Social norms       | People important to me try not to drink sugary drinks                                                                                                                                                                                                 | Neither agree nor disagree, Disagree, Strongly disagree, Don't know, Refuse to answer                                                                           | Not agree         |
|                    |                                                                                                                                                                                                                                                       | Strongly agree, Agree                                                                                                                                           | Agree             |
| Attitudes          | Sugary drinks taste good                                                                                                                                                                                                                              | Strongly agree, Agree                                                                                                                                           | Agree             |
|                    |                                                                                                                                                                                                                                                       | Neither agree nor disagree, Disagree, Strongly disagree, Don't know, Refuse to answer                                                                           | Not agree         |
| Knowledge          | Frequently drinking sugary drinks increases the risk of obesity                                                                                                                                                                                       | False, Don't know, Refuse to answer                                                                                                                             | Not true          |
|                    |                                                                                                                                                                                                                                                       | True                                                                                                                                                            | True              |
| Expert trust       | I trust messages from health experts on sugary drinks                                                                                                                                                                                                 | Neither agree nor disagree, Disagree, Strongly disagree, Don't know, Refuse to answer                                                                           | Not agree         |
|                    |                                                                                                                                                                                                                                                       | Strongly agree, Agree                                                                                                                                           | Agree             |
| Industry trust     | I trust messages from the food and beverage industry on sugary drinks                                                                                                                                                                                 | Neither agree nor disagree, Disagree, Strongly disagree, Don't know, Refuse to answer                                                                           | Not agree         |
|                    |                                                                                                                                                                                                                                                       | Strongly agree, Agree                                                                                                                                           | Agree             |
| Support            | In 2018 a new sugary drink tax will be/was introduced in the UK. This aims to encourage manufacturers to reduce the sugar in drinks. The money will be spent on breakfast clubs, and sports in primary schools. Do you support or oppose this policy? | Strongly support, Support                                                                                                                                       | Support           |
|                    |                                                                                                                                                                                                                                                       | Oppose, Strongly oppose, Don't know, Refuse to answer                                                                                                           | Oppose            |
| Effectiveness      | Preamble as above. How effective do you think these kinds of policies would be/are?                                                                                                                                                                   | Somewhat effective, Mostly effective, Very effective                                                                                                            | Effective         |
|                    |                                                                                                                                                                                                                                                       | Not at all effective, Don't know, Refuse to answer                                                                                                              | Not effective     |

*Note.* SSB = sugar sweetened beverage; NVQ = National Vocational Qualification; HNC = Higher National Certificate; HND = Higher National Diploma, RSA = Royal Society of Arts; BTEC = Business and Technology Education Council

### *Outcome variables*

The outcome variables of interest were single-item measures of support for, and perceived effectiveness of, the SDIL as described in Table 1.

### *Exposure variable*

The exposure variable of interest was year – either 2017, 2018 or 2019.

### *Potential confounding variables*

We adjusted for a number of individual-level socio-demographic and psychological variables in the analysis (see Table 1 for details). With the exception of age, education and income sufficiency, these all showed associations with one or both outcome variables in our previous analysis of 2017 data.[32] Given that age and markers of socio-economic position, such as education and income sufficiency, have been previously, if inconsistently, associated with public support for SSB taxes,[10 12 15 17 23-25 28 29] we included them here, despite no relationship with the outcomes in our previous analysis.

We included single-item measures of attitudes, knowledge, and social norms related to sugary drinks; and trust in advice on sugary drinks from health experts and the food and beverage industry. As previous research has indicated that the acceptability of food taxes varies with the stated intentions of these,[9 18 19 26 29 30] we included a preamble to the questions about support for, and perceived effectiveness of, the SDIL outlining the intention of the levy and the stated use of revenue generated.

Socio-demographic variables considered were age in years, sex at birth, whether or not participants had dependent children, and socio-economic position. Parental status was included as the SDIL has been particularly framed in terms of potential benefits for children.[35 38] Socio-economic position was measured using participants' highest educational qualification and perceived income sufficiency.

Current behaviour has previously been associated with perceived acceptability of public health interventions,[31] and we found that SSB consumers were less likely to support the SDIL in 2017. As such, we adjusted for SSB consumption using the Beverage Frequency Questionnaire. This is a 7-day food record that assesses consumption of 17 beverage categories, including caloric and non-caloric beverages.[39] For each beverage category, respondents report the number of drinks and the usual portion size using category-specific images of beverage containers adapted from the Automated Self-Administered 24 hour (ASA24) dietary assessment tool. Participants who reported any consumption of regular fizzy drinks, alcoholic drinks with regular mixers or cocktails that have calories, sweetened fruit drinks, sports drinks, or energy drinks over the previous seven days were considered SSB consumers.

## Analysis

Data were weighted with post-stratification sample weights constructed using population estimates from the UK census based on age group, sex and region. These were used throughout the analysis to reduce the effects of non-response and selection bias.

Descriptive statistics were used to quantify all variables of interest. Logistic regression models were fitted to explore associations between study wave and support for, and perceived effectiveness of, the SDIL before and after adjustment for other variables. We used separate models to explore support for the SDIL and perceived effectiveness of the SDIL. In these models support or perceived effectiveness were the outcome variables, study wave was the exposure variable, and all other variables were covariates. We used the fully adjusted models, and mean values of covariates, to predict the proportion of the population likely to be supportive of the SDIL, and think it would be effective, at each time point.

Data were analysed using Stata version 15.

## Ethics

The study received ethical clearance from a University of Waterloo Research Ethics Committee (ORE# 21460 and ORE# 30829). All participants provided informed consent to take part.

## Patient and public involvement

Patients and the public were not involved in the design, conduct, analysis or interpretation of the study.

## RESULTS

A total of 25,692 adults took part in IFPS across all included countries in 2017, 28,684 in 2018 and 29,290 in 2019. After removing respondents with missing data on sex at birth and age, and those who did not meet data quality checks, 18,878 (73.5%) respondents remained in 2017, 22,824 (79.6%) in 2017 and 20,968 (71.6%) in 2019. Of these, 4047 were from the UK in 2017, 5549 in 2018, and 4139 in 2019. Amongst these UK participants, 3104 (76.7%) met the additional inclusion criteria for the current work in 2017, 4118 (74.2%) in 2018, and 3062 (74.0%) in 2019. Characteristics of the analytical sample (after applying survey weights) are described in Table 2. Mean age (standard deviation) was 38 (13) years in 2107 participants, 41 (13) in 2018, and 42 (13) in 2019.

**Table 2. Weighted unadjusted characteristics of UK participants; International Food Policy Study, 2017-19**

| Concept            | Question wording                                                                                                                                                                                                                                      | Response category | Weighted percentage (95% confidence intervals) |               |               |                 |
|--------------------|-------------------------------------------------------------------------------------------------------------------------------------------------------------------------------------------------------------------------------------------------------|-------------------|------------------------------------------------|---------------|---------------|-----------------|
|                    |                                                                                                                                                                                                                                                       |                   | 2017, n=3104                                   | 2018, n=4118  | 2019, n=3062  | Total, n=10,284 |
| Sex                | What sex were you assigned at birth, meaning on your original birth certificate?                                                                                                                                                                      | Female            | 48 (46 to 50)                                  | 50 (48 to 52) | 50 (48 to 52) | 49 (48 to 51)   |
| Education          | What is the highest level of education you have completed?                                                                                                                                                                                            | School level      | 61 (59 to 63)                                  | 74 (72 to 75) | 74 (73 to 76) | 70 (69 to 71)   |
| Income sufficiency | How easy is it to make ends meet?                                                                                                                                                                                                                     | Not easy          | 61 (59 to 63)                                  | 66 (65 to 68) | 66 (64 to 68) | 65 (64 to 66)   |
| Children           | Do you have any children (including step-children or adopted) under 18?                                                                                                                                                                               | No                | 63 (61 to 65)                                  | 68 (66 to 70) | 65 (62 to 67) | 66 (64 to 67)   |
| SSB consumption    | Consumed regular fizzy drinks, sweetened fruit drinks, sports drinks, energy drinks in last week                                                                                                                                                      | Consumers         | 53 (50 to 55)                                  | 44 (42 to 45) | 44 (42 to 47) | 46 (45 to 48)   |
| Social norms       | People important to me try not to drink sugary drinks                                                                                                                                                                                                 | Not agree         | 46 (44 to 48)                                  | 52 (50 to 54) | 51 (48 to 53) | 50 (48 to 51)   |
| Attitudes          | Sugary drinks taste good                                                                                                                                                                                                                              | Agree             | 62 (60 to 64)                                  | 64 (63 to 66) | 59 (57 to 61) | 62 (61 to 63)   |
| Knowledge          | Frequently drinking sugary drinks increases the risk of obesity                                                                                                                                                                                       | Not true          | 10 (9 to 12)                                   | 14 (13 to 16) | 12 (10 to 13) | 12 (12 to 13)   |
| Expert trust       | I trust messages from health experts on sugary drinks                                                                                                                                                                                                 | Not agree         | 39 (37 to 41)                                  | 40 (38 to 42) | 41 (39 to 43) | 40 (39 to 41)   |
| Industry trust     | I trust messages from the food and beverage industry on sugary drinks                                                                                                                                                                                 | Not agree         | 73 (71 to 75)                                  | 69 (67 to 70) | 68 (66 to 70) | 70 (69 to 71)   |
| Support            | In 2018 a new sugary drink tax will be/was introduced in the UK. This aims to encourage manufacturers to reduce the sugar in drinks. The money will be spent on breakfast clubs, and sports in primary schools. Do you support or oppose this policy? | Support           | 70 (68 to 72)                                  | 66 (64 to 68) | 66 (64 to 68) | 67 (66 to 68)   |
| Effectiveness      | Preamble as above. How effective do you think these kinds of policies are?                                                                                                                                                                            | Effective         | 71 (69 to 73)                                  | 66 (64 to 67) | 65 (63 to 67) | 67 (66 to 68)   |

Note. SSB = sugar sweetened beverage

1  
2  
3 Table 3 shows the results of logistic regression analyses of associations between survey wave and  
4 support for, and perceived effectiveness of, the SDIL, before and after adjusting for the socio-  
5 demographic and psychological concepts listed. In unadjusted analyses, both support for, and perceived  
6 effectiveness of, the SDIL dropped between 2017 and 2018, but there was little difference in effect  
7 estimates in 2018 vs 2017 and in 2019 vs 2017.  
8  
9  
10

11  
12 In adjusted analyses there was no evidence that the proportion of participants supporting the SDIL  
13 changed between 2017 and either 2018 or 2019. In contrast, the proportion who perceived the SDIL to  
14 be effective in 2018 and 2019 was lower than that in 2017. However, the difference in the proportion  
15 who perceived the SDIL to be effective was very similar in 2018 vs 2017 and 2019 vs 2017 indicating that  
16 the decreased in perceived effectiveness occurred between 2017 and 2018.  
17  
18  
19  
20

21 Holding all other variables at their mean levels, the adjusted logistic regression model predicted that  
22 70% (95% CI: 68 to 72) of participants supported the SDIL in 2017, 68% (95% CI: 67 to 70%) in 2018, and  
23 68% (95% CI: 66 to 70) in 2019 (Figure 1). Comparable figures for perceived effectiveness were 72%  
24 (95% CI: 70 to 74) in 2017, 67% (95% CI: 65 to 69) in 2018, and 67% (95% CI: 64 to 69) in 2019 (Figure 1).  
25  
26  
27  
28

29 Other variables in the adjusted models were also associated with support for, and perceived  
30 effectiveness of, the SDIL (Table 3). Greater support for the SDIL was associated with: older age, having a  
31 higher level of education, not having children at home, being a non-consumer of SSBs, having social  
32 norms to avoid sugary drinks, disliking the taste of sugary drinks, recognising an association between  
33 sugary drinks and obesity, trusting health expert messages on sugary drinks and not trusting industry  
34 messages on sugary drinks. Greater perceived effectiveness of the SDIL was associated with: younger  
35 age, having social norms to avoid sugary drinks, disliking the taste of sugary drinks, trusting health  
36 expert messages on sugary drinks and trusting industry messages on sugary drinks.  
37  
38  
39  
40  
41  
42  
43  
44  
45  
46  
47  
48  
49  
50  
51  
52  
53  
54  
55  
56  
57  
58  
59  
60

**Table 3. Adjusted odds ratios (95% confidence intervals) of the association between year and support for, and perceived effectiveness of, the Soft Drinks Industry Levy; International Food Policy Study, 2017-19**

| Concept            | Question wording (where applicable)                                                              | Response category | Support for the SDIL       |                            | Perceived effectiveness of the SDIL |                            |
|--------------------|--------------------------------------------------------------------------------------------------|-------------------|----------------------------|----------------------------|-------------------------------------|----------------------------|
|                    |                                                                                                  |                   | Unadjusted                 | Adjusted                   | Unadjusted                          | Adjusted                   |
| Survey wave        | Not applicable                                                                                   | 2017              | Reference                  | Reference                  | Reference                           | Reference                  |
|                    |                                                                                                  | 2018              | <b>0.84 (0.75 to 0.95)</b> | 0.93 (0.81 to 1.05)        | <b>0.77 (0.68 to 0.87)</b>          | <b>0.78 (0.69 to 0.88)</b> |
|                    |                                                                                                  | 2019              | <b>0.84 (0.74 to 0.96)</b> | 0.90 (0.78 to 1.03)        | <b>0.76 (0.67 to 0.87)</b>          | <b>0.76 (0.66 to 0.86)</b> |
| Age                | How old are you?                                                                                 | Years             |                            | <b>1.02 (1.01 to 1.02)</b> |                                     | <b>0.98 (0.98 to 0.98)</b> |
| Sex                | What sex were you assigned at birth, meaning on your original birth certificate?                 | Female            |                            | Reference                  |                                     | Reference                  |
|                    |                                                                                                  | Male              |                            | 1.02 (0.92 to 1.13)        |                                     | 1.04 (0.94 to 1.15)        |
| Education          | What is the highest level of education you have completed?                                       | School level      |                            | Reference                  |                                     | Reference                  |
|                    |                                                                                                  | Post school level |                            | <b>1.19 (1.07 to 1.32)</b> |                                     | 1.00 (0.90 to 1.10)        |
| Income sufficiency | How easy is it to make ends meet?                                                                | Not easy          |                            | Reference                  |                                     | Reference                  |
|                    |                                                                                                  | Easy              |                            | 1.07 (0.95 to 1.19)        |                                     | 1.04 (0.93 to 1.16)        |
| Dependent children | Do you have any children (including step-children or adopted children) under 18?                 | No                |                            | Reference                  |                                     | Reference                  |
|                    |                                                                                                  | Yes               |                            | <b>0.81 (0.73 to 0.91)</b> |                                     | 1.11 (0.99 to 1.24)        |
| SSB consumption    | Consumed regular fizzy drinks, sweetened fruit drinks, sports drinks, energy drinks in last week | Consumers         |                            | Reference                  |                                     | Reference                  |
|                    |                                                                                                  | Non-consumers     |                            | <b>1.12 (1.01 to 1.25)</b> |                                     | 1.01 (0.91 to 1.12)        |
| Social norms       | People important to me try not to drink sugary drinks                                            | Not agree         |                            | Reference                  |                                     | Reference                  |
|                    |                                                                                                  | Agree             |                            | <b>1.35 (1.21 to 1.50)</b> |                                     | <b>1.35 (1.21 to 1.51)</b> |
| Attitudes          | Sugary drinks taste good                                                                         | Agree             |                            | Reference                  |                                     | Reference                  |
|                    |                                                                                                  | Not agree         |                            | <b>1.32 (1.18 to 1.48)</b> |                                     | <b>1.34 (1.21 to 1.50)</b> |
| Knowledge          | Frequently drinking sugary drinks increases the risk of obesity                                  | Not true          |                            | Reference                  |                                     | Reference                  |
|                    |                                                                                                  | True              |                            | <b>2.76 (2.35 to 3.25)</b> |                                     | <b>1.26 (1.07 to 1.48)</b> |
| Expert trust       | I trust messages from health experts on sugary drinks                                            | Not agree         |                            | Reference                  |                                     | Reference                  |
|                    |                                                                                                  | Agree             |                            | <b>2.36 (2.09 to 2.66)</b> |                                     | <b>1.96 (1.76 to 2.20)</b> |
| Industry trust     | I trust messages from the food and beverage industry on sugary drinks                            | Not agree         |                            | Reference                  |                                     | Reference                  |
|                    |                                                                                                  | Agree             |                            | <b>0.72 (0.64 to 0.82)</b> |                                     | <b>1.52 (1.34 to 1.73)</b> |

Note. SDIL = Soft Drinks Industry Levy; **BOLD** indicates statistically significant at the p<0.05 level; adjusted for all concepts listed

## DISCUSSION

### Summary of findings

As far as we are aware, this is the first study to explore whether public acceptability of an SSB tax, operationalised in terms of support and perceived effectiveness, changed from before to after implementation. It also adds to the small existing literature on public acceptability of implemented (rather than hypothetical) SSB taxes. In this population-based, repeat cross-sectional survey, after adjustment for a range of socio-demographic and psychological covariates, we found that predicted support for the SDIL remained consistently high throughout (68-70%), with no evidence that support changed from four months before to 20 months after implementation. Whilst perceived effectiveness of the SDIL was also high throughout (67-72%), there was evidence that predicted perceived effectiveness of the SDIL decreased from 72% before implementation to 67% after implementation. This change was evident 7-8 months after implementation, with no further decrease 12 months later.

### Strengths and weaknesses of methods

Key strengths of the analysis are the large (relatively to other work in the field)[9], population-based, sample; inclusion of a range of socio-demographic, consumption and psychological variables; the context of an implemented, rather than hypothetical, SSB tax in the latter two time points; and consistency of methods across all three time points. Given previous findings showing that support for SSB taxes is greater when revenues are used for health-promoting activities,[9 18 19 26 29 30] we were careful to present the SDIL with revenues ear-marked for health-promotion activities. We also clearly stated that it was an intervention designed to target manufacturers rather than consumers. Social desirability bias may also be less likely to occur in more anonymous settings such as on-line surveys.[40]

Participants were recruited using non-probability sampling. Despite the use of weights for age, sex and region, the findings do not necessarily provide nationally representative estimates; and are limited to ages 18-64 years. Whilst the pattern of results in terms of patterns of associations between variables are likely to be generalizable to the UK, the estimates of absolute frequency may not be. Given international differences in dietary public health policy,[41] the pattern of findings may not be generalizable beyond the UK. Although the IFPS takes place in a number of countries key questions used here were only asked of UK participants.



1  
2  
3 All variables were self-reported. Whilst all have strong face validity and the Beverage Frequency  
4 Questionnaire performs well compared to a seven day food record,[39] we have not explored validity or  
5 reliability of the other measures used. However, many were derived from existing instruments.  
6  
7

### 8 **Comparison to previous results and interpretation of findings**

9  
10 Overall, there was high support for the SDIL throughout with no evidence of significant change across  
11 years. The 68-70% prevalence of support we found is noticeably higher than the previously reported  
12 ranges of 35-60%[10-26] and a pooled estimate of 42%.[9] We propose three potential reasons why  
13 support here may be higher than previously reported. Firstly, most previous data on support for SSB  
14 taxes has been collected in the context of hypothetical taxes. Previous systematic review evidence  
15 suggests that support for governmental public health interventions tends to increase after  
16 implementation.[31] Whilst 2017 data was collected four months prior to implementation of the SDIL,  
17 the policy intention was announced in March 2016, 20 months before 2017 data collection. As such,  
18 many participants may have either believed the SDIL had already been implemented, or at least  
19 accepted that it was going to be implemented, at the time of 2017 data collection. Comparable pre-  
20 announcement data is not available.  
21  
22

23  
24 Secondly, other than our previous work using the 2017 data, the only other study of support for the SDIL  
25 focused particularly on parents.[33] This found that 1-3 months after implementation 57% of parents  
26 supported what the SDIL was trying to achieve 1-3 months after implementation. We found that those  
27 with dependent children were less likely to support the SDIL than those without (overall adjusted  
28 predicted support was 70% (95% CI: 69 to 72) in those without children, and 66% (95% CI: 64 to 68) in  
29 those with children) meaning that our sample including both those with and without dependent children  
30 would likely have higher support than one focused exclusively on parents.  
31  
32

33  
34 Finally, previous research has found that support for SSB taxes consistently increases when it is made  
35 clear that revenues will be used for health promotion.[9 18 19 26 29 30] We indicated that the  
36 government's stated intention for SDIL revenues was to spend them "on breakfast clubs, and sports in  
37 primary schools". This may have increased support compared to others studies.  
38  
39

40  
41 Whilst perceived effectiveness also remained high throughout, it decreased from 72% in 2017 to 67% in  
42 2018 and 2019. We proposed two potential explanations. Firstly, it is possible that the initial decrease in  
43 perceived effectiveness reflects an assumption that the levy achieves its effects via price increases,  
44 coupled with limited experience of price increases. The Government's stated (and achieved) aim of the  
45 SDIL was to prompt reformulation and we were careful to state this in the survey.[36] Despite this, many  
46  
47  
48  
49  
50  
51  
52  
53  
54  
55  
56  
57  
58  
59

1  
2  
3 people may find it difficult to dissociate the concept of 'tax' from price increases and so assume that this  
4 is how the levy achieves its effects. This may have been reinforced by temporary signage in stores in  
5 spring 2018 explaining that any recent price increases were due to the levy.[42] The true effect of the  
6 SDIL on SSB prices was not straightforward with some taxed categories increasing in price and others  
7 decreasing.[36] Further, only 44% of parents reported noticing an increase in SSB prices following SDIL  
8 implementation.[33] Nevertheless, if participants believed the levy would only work if it increased prices  
9 and they did not consistently experience price increases, they could well conclude it was less effective  
10 than they would have predicted prior to implementation. Secondly, the drop in perceived effectiveness  
11 between 2017 (pre-implementation) and 2018 (post-implementation) may reflect the difference  
12 between a hypothetical and implemented tax, and that despite similar wording, the measures of  
13 perceived effectiveness used in these years were not entirely comparable.  
14  
15  
16  
17  
18  
19  
20  
21

22 The associations between socio-demographic and psychological covariates and both support for and  
23 perceived effectiveness of the SDIL largely reflect those reported in our previous analysis.[32] As these  
24 associations were not the focus of the present work, we refer readers there for a fuller consideration of  
25 the interpretation of these associations. In brief, the patterns found largely reflect an intuitive  
26 association between more 'public health' orientated attitudes and beliefs and acceptability of the SDIL.  
27  
28  
29  
30

### 31 **Implications of findings**

32  
33 Many structural public health interventions, such as SSB taxes, require government action. This means  
34 that political support is an important determinant of implementation of such interventions. Public  
35 acceptability may be one important influence on political support. Public acceptability may not just  
36 impact on short term effectiveness via mechanisms such as cross-border shopping, but also on tax  
37 longevity and hence long-term effectiveness. Even when written into legislation such interventions are  
38 not necessarily immutable. For example, the SSB tax in Chicago, IL was repealed two months after  
39 implementation,[6] and a tax on high fat products in Denmark was repealed after a year.[7] In the UK, a  
40 proposed tax increase on hot baked goods (the 'pasty tax') was abandoned before implementation  
41 following a public outcry.[8] Given this history of repeal of structural interventions, public acceptability  
42 is likely to be an important determinant not just of initial implementation but of ongoing longevity and  
43 hence long-term impact. That public support for, and perceived effectiveness of, the SDIL remains high  
44 even after implementation may help it persist and give confidence to policymakers elsewhere that SSB  
45 taxes, and other structural public health interventions, can have high and ongoing public acceptability.  
46  
47  
48  
49  
50  
51  
52  
53  
54  
55  
56  
57  
58  
59  
60

1  
2  
3 This may be particularly important with the recent move in the UK towards more structural policies to  
4 address obesity in the last five years.[43]  
5

6  
7 Given our finding of a small drop in perceived effectiveness between before and after implementation  
8 of the SDIL, it may be valuable to continue to monitor this. Greater understanding of what makes  
9 effective structural public health interventions more and less attractive to the public, and how they can  
10 be framed to increased acceptability is also required.  
11  
12  
13

## 14 **CONCLUSIONS**

15  
16 There is high support for the SDIL amongst UK adults and this did not change between four months  
17 before implementation and 20 months after. Perceived effectiveness of the SDIL also remained high, but  
18 there was evidence of a small decrease after implementation in 2018. This may relate to reported  
19 complexities in the impact of the SDIL on SSB prices and the difference between reporting on perceived  
20 effectiveness of a hypothetical versus implemented policy. Whilst public acceptability of structural  
21 public health interventions is recognised as an important determinant of implementation, it may also be  
22 an important determinant of policy persistence. Greater understanding of influences on public  
23 acceptability of structural public health interventions such as SSB taxes, and how it can be increased, is  
24 required.  
25  
26  
27  
28  
29  
30  
31  
32  
33  
34  
35  
36  
37  
38  
39  
40  
41  
42  
43  
44  
45  
46  
47  
48  
49  
50  
51  
52  
53  
54  
55  
56  
57  
58  
59  
60

## FIGURE LEGEND

**Figure 1. Predicted percentage (95% confidence intervals) of participants who supported (left) and perceived the Soft Drinks Industry Levy to be effective (right); International Food Policy Study, 2017-19**

## FUNDING

Funding for this project was provided by a Canadian Institutes of Health Research (CIHR) Project Grant (PJT-162167). Additional support was provided by an International Health Grant from the Public Health Agency of Canada (PHAC), and a PHAC - CIHR Chair in Applied Public Health (no grant number available). Collection of 2017 and 2018 UK data collection was supported by the Health Foundation (no grant numbers available). JA & MW are supported by the Medical Research Council (grant number MC\_UU\_00006/7) and the Centre for Diet and Activity Research (CEDAR), a UKCRC Public Health Research Centre of Excellence (grant number MR/K023187/1): funding for CEDAR from the British Heart Foundation, Cancer Research UK, Economic and Social Research Council, Medical Research Council, the National Institute for Health Research, and the Wellcome Trust, under the auspices of the UK Clinical Research Collaboration, is gratefully acknowledged. Views expressed in this paper are those of the authors and not necessarily those of the above named funders. The study has no affiliations with the food industry.

## COMPETING INTERESTS

None declared

## AUTHOR CONTRIBUTIONS

JA, DP & MW conceived the idea for this paper. JA analysed the data and drafted the manuscript. JA, TP, MW, DH and LV read and provided critical comments on the manuscript and approved the final version. DH conceived the idea for the IFPS and secured funding. DH and LV developed the first draft of survey. TP led the further development of the UK survey instrument, with input from JA, MW, DH and LV.

## DATA SHARING

Data is available directly from the International Food Policy Study team on reasonable request (see [www.foodpolicystudy.com](http://www.foodpolicystudy.com)).

**REFERENCES**

1. World Health Organization. Tackling NCDs: “Best Buys” and Other Recommended Interventions for the Prevention and Control of Noncommunicable Diseases. Geneva, Switzerland: WHO, 2017.
2. Teng AM, Jones AC, Mizdrak A, Signal L, Genç M, Wilson N. Impact of sugar-sweetened beverage taxes on purchases and dietary intake: Systematic review and meta-analysis. *Obesity Reviews* 2019;**20**:1187-204.
3. Allcott H, Lockwood BB, Taubinsky D. Should We Tax Sugar-Sweetened Beverages? An Overview of Theory and Evidence. *Journal of Economic Perspectives* 2019;**33**:202-27.
4. White M, Adams J. Different scientific approaches are needed to generate stronger evidence for population health improvement. *PLOS Medicine* 2018;**15**:e1002639.
5. Le Bodo Y, Paquette M-C, De Wals P. Social and Political Acceptability of Sugar-Sweetened Beverage Taxation. *Taxing Soda for Public Health: A Canadian Perspective*. Cham: Springer International Publishing, 2016:193-212.
6. Powell LM, Leider J. Evaluation of Changes in Beverage Prices and Volume Sold Following the Implementation and Repeal of a Sweetened Beverage Tax in Cook County, Illinois. *JAMA Network Open* 2020;**3**:e2031083-e83.
7. Stafford N. Denmark cancels “fat tax” and shelves “sugar tax” because of threat of job losses. *BMJ* 2012;**345**:e7889.
8. Robinson M. P-Day! Victory for pasty eaters everywhere as U-turn ends threat of 50p VAT increase (as long as you eat at Greggs or don't mind a lukewarm one) 2012. <https://www.dailymail.co.uk/news/article-2151287/Pasty-tax-U-turn-ends-threat-50p-VAT-increase-long-eat-Greggs-dont-mind-lukewarm-one.html#ixzz1wN1mjr9H>. Accessed 10 Feb 2021
9. Eykelenboom M, van Stralen MM, Olthof MR, et al. Political and public acceptability of a sugar-sweetened beverages tax: a mixed-method systematic review and meta-analysis. *Int J Behav Nutr Phys Act* 2019;**16**:78.
10. Rivard C, Smith D, McCann SE, Hyland A. Taxing sugar-sweetened beverages: a survey of knowledge, attitudes and behaviours. *Public health nutrition* 2012;**15**:1355-61.
11. Barry CL, Niederdeppe J, Gollust SE. Taxes on sugar-sweetened beverages: results from a 2011 national public opinion survey. *American journal of preventive medicine* 2013;**44**:158-63.
12. Donaldson EA, Cohen JE, Rutkow L, Villanti AC, Kanarek NF, Barry CL. Public support for a sugar-sweetened beverage tax and pro-tax messages in a Mid-Atlantic US state. *Public health nutrition* 2015;**18**:2263-73.
13. Jou J, Niederdeppe J, Barry CL, Gollust SE. Strategic messaging to promote taxation of sugar-sweetened beverages: lessons from recent political campaigns. *American journal of public health* 2014;**104**:847-53.

14. Niederdeppe J, Gollust SE, Jarlenski MP, Nathanson AM, Barry CL. News coverage of sugar-sweetened beverage taxes: pro- and antitax arguments in public discourse. *American journal of public health* 2013;**103**:e92-8.
15. Simon PA, Chiang C, Lightstone AS, Shih M. Public Opinion on Nutrition-Related Policies to Combat Child Obesity, Los Angeles County, 2011. *Preventing Chronic Disease* 2014;**11**:E96.
16. Somerville C, Marteau TM, Kinmonth AL, Cohn S. Public attitudes towards pricing policies to change health-related behaviours: a UK focus group study. *European Journal of Public Health* 2015;**25**:1058-64.
17. Petrescu D, Hollands G, Couturier D, Ng Y, Marteau T. Public acceptability in the UK and USA of nudging to reduce obesity: The example of reducing sugar-sweetened beverages consumption. *PLoS ONE* 2016;**11**:1-18.
18. Thomas-Meyer M, Mytton O, Adams J. Public responses to proposals for a tax on sugar-sweetened beverages: A thematic analysis of online reader comments posted on major UK news websites. *PLOS ONE* 2017;**12**:e0186750.
19. Timpson H, Lavin R, Hughes L. Exploring the Acceptability of a Tax on Sugar-Sweetened Beverages: Insight Work. Liverpool: Centre for Public Health, Liverpool John Moores University, 2013.
20. Beeken RJ, Wardle J. Public beliefs about the causes of obesity and attitudes towards policy initiatives in Great Britain. *Public health nutrition* 2013;**16**:2132-7.
21. Cancer Research UK, UK Health Forum. Short and sweet: why the government should introduce a sugary drinks tax in the UK. London, 2016.
22. ComRes. Daily Mail sugar tax poll 2015. <http://www.comres.co.uk/polls/daily-mail-sugar-tax-poll/>. Accessed 2 March 2016
23. Ipsos Mori Social Research Institute. Great Britain: The way we live now. Understanding Society 2013;**December 2013**.
24. Curry LE, Rogers T, Williams P, Homsy G, Willett J, Schmitt CL. Public Attitudes and Support for a Sugar-Sweetened Beverage Tax in America's Heartland. *Health promotion practice* 2017;**19**:418-26.
25. Fatemi M, Murray R, Langley T. Public acceptance of obesity prevention policies in the UK. *Journal of Cancer Policy* 2020;**27**:100256.
26. Cullerton K, Baker P, Adsett E, Lee A. What do the Australian public think of regulatory nutrition policies? A scoping review. *Obesity Reviews* 2021;**22**:e13106.
27. Kwon J, Cameron AJ, Hammond D, et al. A multi-country survey of public support for food policies to promote healthy diets: Findings from the International Food Policy Study. *BMC Public Health* 2019;**19**:1205.
28. Gollust SE, Barry CL, Niederdeppe J. Americans' opinions about policies to reduce consumption of sugar-sweetened beverages. *Preventive Medicine* 2014;**63**:52-57.

- 1  
2  
3 29. Julia C, Mejean C, Vicari F, Peneau S, Hercberg S. Public perception and characteristics related to  
4 acceptance of the sugar-sweetened beverage taxation launched in France in 2012. *Public health*  
5 *nutrition* 2015;**18**:2679-88.  
6
- 7 30. Moretto N, Kendall E, Whitty J, et al. Yes, the government should tax soft drinks: findings from a  
8 citizens' jury in Australia. *International journal of environmental research and public health*  
9 2014;**11**:2456-71.  
10
- 11 31. Diepeveen S, Ling T, Suhrcke M, Roland M, Marteau T. Public acceptability of government  
12 intervention to change health-related behaviours: a systematic review and narrative synthesis.  
13 *BMC Public Health* 2013;**13**:756.  
14
- 15 32. Pell D, Penney T, Hammond D, Vanderlee L, White M, Adams J. Support for, and perceived  
16 effectiveness of, the UK soft drinks industry levy among UK adults: cross-sectional analysis of the  
17 International Food Policy Study. *BMJ Open* 2019;**9**:e026698.  
18
- 19 33. Gillison F, Grey E, Griffin T. Parents' Perceptions and Responses to the UK Soft Drinks Industry Levy. *J*  
20 *Nutr Educ Behav* 2020;**52**:626-31.  
21
- 22 34. HM Revenue & Customs. Soft Drinks Industry Levy 2016.  
23 [https://www.gov.uk/government/publications/soft-drinks-industry-levy/soft-drinks-industry-](https://www.gov.uk/government/publications/soft-drinks-industry-levy/soft-drinks-industry-levy)  
24 [levy](https://www.gov.uk/government/publications/soft-drinks-industry-levy/soft-drinks-industry-levy). Accessed 5 December  
25  
26
- 27 35. Gauke D. Budget 2016. London: HM Treasury, 2016.  
28
- 29 36. Scarborough P, Adhikari V, Harrington RA, et al. Impact of the announcement and implementation of  
30 the UK Soft Drinks Industry Levy on sugar content, price, product size and number of available  
31 soft drinks in the UK, 2015-19: A controlled interrupted time series analysis. *PLoS Medicine*  
32 2020;**17**:e1003025.  
33
- 34 37. Pell D, Mytton O, Penney T, et al. Changes in British household purchases of soft drinks associated  
35 with implementation of the Soft Drinks Industry Levy: a controlled interrupted time series  
36 analysis. *BMJ* 2021;**372**:doi:10.1136/bmj.n254.  
37
- 38 38. HM Government. Childhood Obesity: A Plan for Action, 2016.  
39
- 40 39. Vanderlee L, Reid JL, White CM, et al. Evaluation of the online Beverage Frequency Questionnaire  
41 (BFQ). *Nutr J* 2018;**17**:73.  
42
- 43 40. Adams J, Bateman B, Becker F, et al. Effectiveness and acceptability of parental financial incentives  
44 and quasi-mandatory schemes for increasing uptake of vaccinations in preschool children:  
45 systematic review, qualitative study and discrete choice experiment. *Health technology*  
46 *assessment (Winchester, England)* 2015;**19**:1-176.  
47
- 48 41. Vanderlee L, White CM, Kirkpatrick SI, et al. Non-alcoholic and alcoholic beverage intakes by adults  
49 across five upper-middle and high-income countries. *Journal of Nutrition* 2021;**151**:140-51.  
50
- 51 42. Smith G. More than 300 businesses hit by sugar tax - but revenues will be half expected 2018.  
52 <https://www.newfoodmagazine.com/news/72139/more-than-300-sugar-tax/>. Accessed 10 Feb  
53 2021  
54  
55  
56  
57  
58  
59

1  
2  
3 43. Theis DRZ, White M. Is Obesity Policy in England Fit for Purpose? Analysis of Government Strategies  
4 and Policies, 1992-2020. The Milbank quarterly 2021;99:126-70.  
5  
6  
7  
8  
9  
10  
11  
12  
13  
14  
15  
16  
17  
18  
19  
20  
21  
22  
23  
24  
25  
26  
27  
28  
29  
30  
31  
32  
33  
34  
35  
36  
37  
38  
39  
40  
41  
42  
43  
44  
45  
46  
47  
48  
49  
50  
51  
52  
53  
54  
55  
56  
57  
58  
59  
60

For peer review only



1  
2  
3  
4  
5  
6  
7  
8  
9  
10  
11  
12  
13  
14  
15  
16  
17  
18  
19  
20  
21  
22  
23  
24  
25  
26  
27  
28  
29  
30  
31  
32  
33  
34  
35  
36  
37  
38  
39  
40  
41  
42  
43  
44  
45  
46  
47  
48  
49  
50  
51  
52  
53  
54  
55  
56  
57  
58  
59  
60

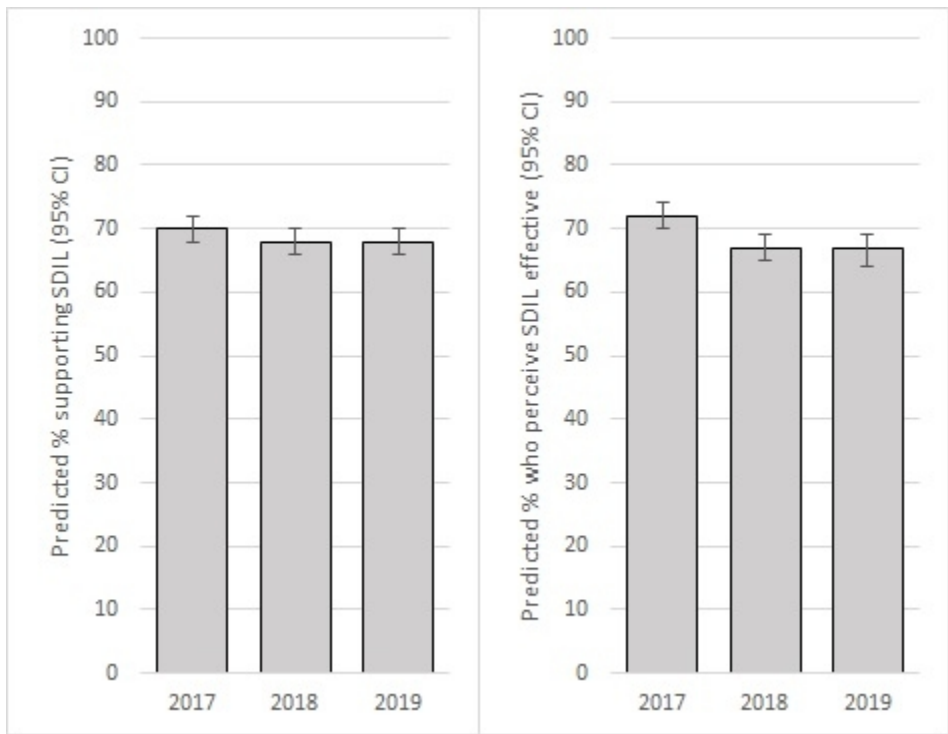

Predicted percentage (95% confidence intervals) of participants who supported (left) and perceived the Soft Drinks Industry Levy to be effective (right); International Food Policy Study, 2017-19

124x96mm (96 x 96 DPI)

STROBE Statement—Checklist of items that should be included in reports of *cross-sectional studies*

|                              | Item No | Recommendation                                                                                                                                                                                               | Page No |
|------------------------------|---------|--------------------------------------------------------------------------------------------------------------------------------------------------------------------------------------------------------------|---------|
| <b>Title and abstract</b>    | 1       | (a) Indicate the study's design with a commonly used term in the title or the abstract                                                                                                                       | 1       |
|                              |         | (b) Provide in the abstract an informative and balanced summary of what was done and what was found                                                                                                          | 2       |
| <b>Introduction</b>          |         |                                                                                                                                                                                                              |         |
| Background/rationale         | 2       | Explain the scientific background and rationale for the investigation being reported                                                                                                                         | 4-5     |
| Objectives                   | 3       | State specific objectives, including any prespecified hypotheses                                                                                                                                             | 5       |
| <b>Methods</b>               |         |                                                                                                                                                                                                              |         |
| Study design                 | 4       | Present key elements of study design early in the paper                                                                                                                                                      | 6       |
| Setting                      | 5       | Describe the setting, locations, and relevant dates, including periods of recruitment, exposure, follow-up, and data collection                                                                              | 6       |
| Participants                 | 6       | (a) Give the eligibility criteria, and the sources and methods of selection of participants                                                                                                                  | 6       |
| Variables                    | 7       | Clearly define all outcomes, exposures, predictors, potential confounders, and effect modifiers. Give diagnostic criteria, if applicable                                                                     | 6-8     |
| Data sources/<br>measurement | 8*      | For each variable of interest, give sources of data and details of methods of assessment (measurement). Describe comparability of assessment methods if there is more than one group                         | 6-8     |
| Bias                         | 9       | Describe any efforts to address potential sources of bias                                                                                                                                                    | 6-9     |
| Study size                   | 10      | Explain how the study size was arrived at                                                                                                                                                                    | 6       |
| Quantitative variables       | 11      | Explain how quantitative variables were handled in the analyses. If applicable, describe which groupings were chosen and why                                                                                 | 6-9     |
| Statistical methods          | 12      | (a) Describe all statistical methods, including those used to control for confounding                                                                                                                        | 9       |
|                              |         | (b) Describe any methods used to examine subgroups and interactions                                                                                                                                          | NA      |
|                              |         | (c) Explain how missing data were addressed                                                                                                                                                                  | 7       |
|                              |         | (d) If applicable, describe analytical methods taking account of sampling strategy                                                                                                                           | 9       |
|                              |         | (e) Describe any sensitivity analyses                                                                                                                                                                        | NA      |
| <b>Results</b>               |         |                                                                                                                                                                                                              |         |
| Participants                 | 13*     | (a) Report numbers of individuals at each stage of study—eg numbers potentially eligible, examined for eligibility, confirmed eligible, included in the study, completing follow-up, and analysed            | 9       |
|                              |         | (b) Give reasons for non-participation at each stage                                                                                                                                                         | 9       |
|                              |         | (c) Consider use of a flow diagram                                                                                                                                                                           | NA      |
| Descriptive data             | 14*     | (a) Give characteristics of study participants (eg demographic, clinical, social) and information on exposures and potential confounders                                                                     | 10      |
|                              |         | (b) Indicate number of participants with missing data for each variable of interest                                                                                                                          | 10      |
| Outcome data                 | 15*     | Report numbers of outcome events or summary measures                                                                                                                                                         | 10      |
| Main results                 | 16      | (a) Give unadjusted estimates and, if applicable, confounder-adjusted estimates and their precision (eg, 95% confidence interval). Make clear which confounders were adjusted for and why they were included | 12      |

1  
2  
3  
4  
5  
6  
7  
8  
9  
10  
11  
12  
13  
14  
15  
16  
17  
18  
19  
20  
21  
22  
23  
24  
25  
26  
27  
28  
29  
30  
31  
32  
33  
34  
35  
36  
37  
38  
39  
40  
41  
42  
43  
44  
45  
46  
47  
48  
49  
50  
51  
52  
53  
54  
55  
56  
57  
58  
59  
60

|                          |    |                                                                                                                                                                            |       |
|--------------------------|----|----------------------------------------------------------------------------------------------------------------------------------------------------------------------------|-------|
|                          |    | (b) Report category boundaries when continuous variables were categorized                                                                                                  | 7     |
|                          |    | (c) If relevant, consider translating estimates of relative risk into absolute risk for a meaningful time period                                                           | NA    |
| Other analyses           | 17 | Report other analyses done—eg analyses of subgroups and interactions, and sensitivity analyses                                                                             | NA    |
| <b>Discussion</b>        |    |                                                                                                                                                                            |       |
| Key results              | 18 | Summarise key results with reference to study objectives                                                                                                                   | 13    |
| Limitations              | 19 | Discuss limitations of the study, taking into account sources of potential bias or imprecision. Discuss both direction and magnitude of any potential bias                 | 13-14 |
| Interpretation           | 20 | Give a cautious overall interpretation of results considering objectives, limitations, multiplicity of analyses, results from similar studies, and other relevant evidence | 14-16 |
| Generalisability         | 21 | Discuss the generalisability (external validity) of the study results                                                                                                      | 13    |
| <b>Other information</b> |    |                                                                                                                                                                            |       |
| Funding                  | 22 | Give the source of funding and the role of the funders for the present study and, if applicable, for the original study on which the present article is based              | 15    |

\*Give information separately for exposed and unexposed groups.

**Note:** An Explanation and Elaboration article discusses each checklist item and gives methodological background and published examples of transparent reporting. The STROBE checklist is best used in conjunction with this article (freely available on the Web sites of PLoS Medicine at <http://www.plosmedicine.org/>, Annals of Internal Medicine at <http://www.annals.org/>, and Epidemiology at <http://www.epidem.com/>). Information on the STROBE Initiative is available at [www.strobe-statement.org](http://www.strobe-statement.org).

# BMJ Open

## PUBLIC ACCEPTABILITY OF THE UK SOFT DRINKS INDUSTRY LEVY: REPEAT CROSS-SECTIONAL ANALYSIS OF THE INTERNATIONAL FOOD POLICY STUDY (2017-2019)

|                                 |                                                                                                                                                                                                                                                                                                                                                                                                                                  |
|---------------------------------|----------------------------------------------------------------------------------------------------------------------------------------------------------------------------------------------------------------------------------------------------------------------------------------------------------------------------------------------------------------------------------------------------------------------------------|
| Journal:                        | <i>BMJ Open</i>                                                                                                                                                                                                                                                                                                                                                                                                                  |
| Manuscript ID                   | bmjopen-2021-051677.R1                                                                                                                                                                                                                                                                                                                                                                                                           |
| Article Type:                   | Original research                                                                                                                                                                                                                                                                                                                                                                                                                |
| Date Submitted by the Author:   | 26-Jul-2021                                                                                                                                                                                                                                                                                                                                                                                                                      |
| Complete List of Authors:       | Adams, J; University of Cambridge, MRC Epidemiology Unit<br>Pell, David; University of Cambridge, MRC Epidemiology Unit; NHS<br>RightCare, Midlands Region<br>Penney, Tarra; York University Faculty of Health, School of Global Health<br>Hammond, D; University of Waterloo, School of Public Health<br>Vanderlee, Lana; Universite Laval, Ecole de Nutrition<br>White, Martin; University of Cambridge, MRC Epidemiology Unit |
| <b>Primary Subject Heading</b>: | Public health                                                                                                                                                                                                                                                                                                                                                                                                                    |
| Secondary Subject Heading:      | Nutrition and metabolism                                                                                                                                                                                                                                                                                                                                                                                                         |
| Keywords:                       | NUTRITION & DIETETICS, PUBLIC HEALTH, Health policy < HEALTH SERVICES ADMINISTRATION & MANAGEMENT                                                                                                                                                                                                                                                                                                                                |
|                                 |                                                                                                                                                                                                                                                                                                                                                                                                                                  |

SCHOLARONE™  
Manuscripts



I, the Submitting Author has the right to grant and does grant on behalf of all authors of the Work (as defined in the below author licence), an exclusive licence and/or a non-exclusive licence for contributions from authors who are: i) UK Crown employees; ii) where BMJ has agreed a CC-BY licence shall apply, and/or iii) in accordance with the terms applicable for US Federal Government officers or employees acting as part of their official duties; on a worldwide, perpetual, irrevocable, royalty-free basis to BMJ Publishing Group Ltd ("BMJ") its licensees and where the relevant Journal is co-owned by BMJ to the co-owners of the Journal, to publish the Work in this journal and any other BMJ products and to exploit all rights, as set out in our [licence](#).

The Submitting Author accepts and understands that any supply made under these terms is made by BMJ to the Submitting Author unless you are acting as an employee on behalf of your employer or a postgraduate student of an affiliated institution which is paying any applicable article publishing charge ("APC") for Open Access articles. Where the Submitting Author wishes to make the Work available on an Open Access basis (and intends to pay the relevant APC), the terms of reuse of such Open Access shall be governed by a Creative Commons licence – details of these licences and which [Creative Commons](#) licence will apply to this Work are set out in our licence referred to above.

Other than as permitted in any relevant BMJ Author's Self Archiving Policies, I confirm this Work has not been accepted for publication elsewhere, is not being considered for publication elsewhere and does not duplicate material already published. I confirm all authors consent to publication of this Work and authorise the granting of this licence.

1  
2  
3 **PUBLIC ACCEPTABILITY OF THE UK SOFT DRINKS INDUSTRY LEVY: REPEAT CROSS-SECTIONAL ANALYSIS**  
4 **OF THE INTERNATIONAL FOOD POLICY STUDY (2017-2019)**  
5

6  
7 *Jean Adams,<sup>1\*</sup> David Pell,<sup>1,2†</sup> Tarra Penney,<sup>3</sup> David Hammond,<sup>4</sup> Lana Vanderlee,<sup>5</sup> Martin White<sup>1</sup>*  
8

9  
10 <sup>1</sup>Centre for Diet & Activity Research, MRC Epidemiology Unit, University of Cambridge, Cambridge, UK  
11

12 <sup>2</sup>RightCare, Midlands Region, NHS England, Newcastle upon Tyne, UK  
13

14 <sup>3</sup>School of Global Health, York University, Toronto, Ontario, Canada  
15

16 <sup>4</sup>School of Public Health, University of Waterloo, Waterloo, Ontario, Canada  
17

18 <sup>5</sup>Centre NUTRISS (Nutrition, Santé et Société), École de Nutrition, Université Laval, Quebec, Quebec,  
19  
20  
21 Canada  
22

23 <sup>†</sup>DP was affiliation 1 when this work was originally conceived, but is now affiliation 2  
24  
25

26 **\*Corresponding author:** Jean Adams, Centre for Diet & Activity Research, MRC Epidemiology Unit,  
27  
28 University of Cambridge School of Clinical Medicine, Box 285 Institute of Metabolic Science, Cambridge  
29  
30 Biomedical Campus, Cambridge, UK, CB2 0QQ. Email: [jma79@medschl.cam.ac.uk](mailto:jma79@medschl.cam.ac.uk) Tel: +44 (0) 1223 769  
31  
32 142

33 **Main text word count:** 3493  
34  
35  
36  
37  
38  
39  
40  
41  
42  
43  
44  
45  
46  
47  
48  
49  
50  
51  
52  
53  
54  
55  
56  
57  
58  
59  
60

**ABSTRACT**

**Objectives** To determine whether public acceptability, in terms of both support for and perceived effectiveness of, the UK Soft Drinks Industry Levy (SDIL) changed between four months prior to, and 8 and 20 months after, implementation.

**Design** Repeat cross-sectional on-line survey.

**Setting** UK

**Participants** UK respondents to the International Food Policy Study aged 18-64 years who provided information on all variables of interest in November-December 2017 (4 months prior to SDIL implementation), 2018 (8 months after) or 2019 (20 months after; n=10,284).

**Outcome measures** Self-reported support for, and perceived effectiveness of, the SDIL.

**Results** The adjusted logistic regression model predicted that 70% (95% CI: 68 to 72) of participants supported the SDIL in 2017, 68% (95% CI: 67 to 70) in 2018, and 68% (95% CI: 66 to 70) in 2019. There was no evidence of a difference in support in 2018 vs 2017 (odds ratio (OR): 0.93; 95% confidence intervals (CI): 0.81 to 1.05); or in 2019 vs 2017 (OR: 0.90; 95% CI (0.78 to 1.03)). The adjusted logistic regression model predicted that 72% (95% CI: 70 to 74) of participants perceived the SDIL to be effective in 2017, 67% (95% CI: 65 to 69) in 2018, and 67% (95% CI: 64 to 69) in 2019. There was evidence that perceived effectiveness decreased a small amount in 2018 vs 2017 (OR: 0.78; 95% CI: 0.69 to 0.88). The difference in 2019 vs 2017 was similar.

**Conclusions** We found high support for the SDIL amongst UK adults and this did not change between 4 months before implementation and 8 or 20 months after. Whilst perceived effectiveness remained high, there was evidence that this decreased slightly after implementation in 2018, but no further in 2019. Greater understanding of influences on public acceptability of effective structural public health interventions is required.

**Keywords:** taxation, soda tax, public health, attitudes, nutrition & dietetics

## ARTICLE SUMMARY

### Strengths and limitations of the study

- We used three annual waves of a large, population-based survey (n=10,284).
- We were careful to present the Soft Drinks Industry Levy (SDIL) as an intervention targeted at manufacturers rather than consumers, with revenues ear-marked for health-promotion activities.
- This is a repeat cross-sectional design with measures before and after implementation of the SDIL in April 2018, but all time points were after announcement of the SDIL in March 2016
- Whilst all measures have strong face validity, we have not explored other aspects of validity or reliability of any of the measures used; in many cases it would be hard to know what the 'gold standard' measure should be.



## INTRODUCTION

Taxes on sugar sweetened beverages (SSBs) are recommended by the World Health Organisation to reduce sugar consumption and prevent non-communicable diseases.[1] Systematic review evidence suggests that SSB taxes lead to reductions in SSB purchasing and consumption, but there is substantial heterogeneity in effect sizes[2] and tax design.[3] Better understanding of the contextual factors that influence the effectiveness of SSB taxes may enable taxes to be better tailored to context.[4] Such contextual factors may include public acceptability of SSB taxes.

By their nature, regulatory policies such as SSB taxes require political support for implementation. Political support is, in turn, likely to be influenced by public acceptability. As well as influencing implementation, public acceptability may also influence the effectiveness and longevity of SSB taxes.[5] For example, if price increases following an SSB tax are not acceptable to the public, then they may travel to buy SSBs in un-taxed areas (so called cross-border shopping).[3] Further, a number of food taxes have been repealed after implementation, in part due to perceived public backlash.[6-8] This makes it important to understand how public acceptability of SSB taxes changes after implementation.

Public acceptability of a policy reflects both public support for that policy and perceptions of how effective the policy may be.[9 10] Public support for hypothetical SSB taxes ranges from around 35-60%.[11-28] A recent systematic review reported a pooled figure for support of 42% (95% confidence interval (CI): 38 to 47).[9] Associations between support and variables such as age, sex, SSB consumption and socio-economic position are inconsistent.[11 13 16 18 24-26 28-30] However, support is consistently higher when it is clear that revenue raised will be used for health promotion activities, such as subsidies on healthy food.[9 19 20 27 30 31] There is also evidence that framing of SSB taxes, particularly how SSBs are defined and what the stated aims of taxes are, can influence public support.[32]

A recent systematic review of randomised controlled trials indicates that providing information on the effectiveness (or ineffectiveness) of government policies leads to significant changes in support for those policies.[10] Perceived effectiveness of SSB taxes has been less studied than public support.[9 18 30] However, in a systematic review, pooled estimates were that 39% (95% CI 26 to 54) of the public believe SSB taxes reduce purchases and consumption, and 40% (95% CI 29 to 54) believe that they impact on health-related outcomes.[9] A perception that SSB taxes are unlikely to be effective is a common explanation for low public support in qualitative studies.[9 17 19]

1  
2  
3 Most previous work on public acceptability of SSB taxes has focused on hypothetical taxes. A systematic  
4 review of support for government interventions to change health-related behaviours (that did not  
5 include any studies on SSB taxes) found that support tends to be higher for implemented, rather than  
6 hypothetical, policies.[33] Similarly, perceived effectiveness may be influenced by whether respondents  
7 are reporting on a hypothetical or implemented tax.  
8  
9

10  
11 We are aware of four studies on public acceptability of implemented SSB taxes. One study of the French  
12 excise tax on sweetened beverages found 49% of the public supported the tax and 58% believed it  
13 would improve health.[30] An international study exploring public support for a range of dietary public  
14 health policies in 2017 included data from Mexico, where an SSB tax was implemented in 2014. Whilst  
15 support for an SSB tax was higher in Mexico than other countries (54% vs 30-49%), the same was true  
16 for many other policies studied.[28] Two studies have focused on the UK Soft Drinks Industry Levy (SDIL;  
17 described in Box 1).[34 35] Our previous population-based survey conducted after announcement, but  
18 before implementation (i.e. the 2017 data presented in the current work), of the SDIL found that 70% of  
19 UK adults supported the SDIL and 71% thought it would be effective.[34] Finally, a survey of parents of  
20 children aged 5-11 years conducted soon after SDIL implementation found that 57% supported its  
21 aims.[35] We are not aware of any study exploring change in public acceptability of SSB taxes from  
22 before to after implementation.  
23  
24  
25  
26  
27  
28  
29  
30  
31

32 Our aim was to determine whether public acceptability, in terms of both support for, and perceived  
33 effectiveness of, the SDIL changed between four months prior to implementation (i.e. 20 months after  
34 announcement) and 8 and 20 months after implementation.  
35  
36  
37  
38

39  
40  
41  
42  
43  
44  
45  
46  
47  
48  
49  
50  
51  
52  
53  
54  
55  
56  
57  
58  
59  
60

**Box 1 – Key characteristics of the UK Soft Drinks Industry Levy**[36-39]

- Levied on companies importing or manufacturing SSBs, not consumers
- Intentional two-year delay between announcement (March 2016) and implementation (April 2018) to give manufacturers time to adapt by developing lower sugar products
- Tiered with eligible drinks containing  $\geq 8\text{g}$  of sugar per 100ml charged £0.24 [€0.27, US\$0.33]/litre, those containing  $\geq 5\text{g}$  but  $< 8\text{g}$  charged £0.18 [€0.20, US\$0.24]/litre, and those containing  $< 5\text{g}$  not charged
- Exemptions for pure fruit juices, milk-based drinks and a number of other smaller categories
- Announcement included a statement that revenue raised would be spent on school sport and school breakfast clubs
- Associated with substantial reformulation of the UK soft drinks market to reduce sugar content
- Associated with complex changes in SSB prices with some categories increasing in price and others decreasing
- Associated with no change in volume of all drinks purchased, but a reduction in sugar purchased from drinks

**METHODS**

We used repeat cross-sectional survey data from the International Food Policy Study (IFPS). We conducted both unadjusted analyses and analyses adjusted for a number of socio-demographic and psychological variables that are potential, or previously reported, correlates of support for, and perceived effectiveness of, the SDIL.

**Sampling, recruitment and data collection**

Data were from UK participants in the 2017, 2018 and 2019 waves of IFPS. This is an annual repeat cross-sectional survey conducted in Australia, Canada, Mexico, the UK and the USA with an annual, pragmatic, recruitment target of 4000 adults per country per wave. Data were collected via self-completed web surveys in November-December each year, representing 4-5 months before implementation, but 19-20 months after announcement (2017); 7-8 months after implementation (2018) and 19-20 months after implementation (2019). Respondents were recruited through Nielsen Consumer Insights Global Panel and their partners' panels. Email invitations with unique survey access links were sent to a random sample of panellists within each country after targeting for demographics;

1  
2  
3 panellists known to be ineligible were not invited. Potential respondents were screened for eligibility  
4 and quota requirements based on age and sex. UK participation rates (i.e. “the number of respondents  
5 who provided a usable response divided by the total number of initial personal invitations requesting  
6 participation”)[40] were 7.4%, 11.5% and 4.5% in 2017, 2018 and 2019 respectively.  
7  
8  
9

10 Respondents provided informed consent prior to completing the survey and received remuneration in  
11 accordance with their panel’s usual incentive structure (e.g. points-based or monetary rewards, or  
12 chances to win prizes). A full description of the study methods can be found at  
13  
14  
15 [www.foodpolicystudy.com/methods](http://www.foodpolicystudy.com/methods).  
16

### 17 **Inclusion criteria**

18  
19 We included in the analysis UK resident participants in the 2017, 2018 and 2019 IFPS waves who met the  
20 following criteria: were aged 18-64 years, provided information on sex at birth and age, and passed data  
21 quality checks (provided a valid response to a data quality question; took at least 15 minutes to  
22 complete the survey; and provided a valid response to at least three of 20 open-ended measures).  
23  
24  
25  
26

### 27 **Variables used in the analysis**

28  
29 The variables used in the analysis, the survey items from which they were derived, response options and  
30 how response options were collapsed for analysis are described in Table 1.  
31  
32  
33  
34  
35  
36  
37  
38  
39  
40  
41  
42  
43  
44  
45  
46  
47  
48  
49  
50  
51  
52  
53  
54  
55  
56  
57  
58  
59  
60

**Table 1. Description of items and response options used in the analysis**

| Concept            | Item wording (where applicable)                                                                                                                                                                                                                       | Response options                                                                                                                                                                                     |                                                                         |
|--------------------|-------------------------------------------------------------------------------------------------------------------------------------------------------------------------------------------------------------------------------------------------------|------------------------------------------------------------------------------------------------------------------------------------------------------------------------------------------------------|-------------------------------------------------------------------------|
|                    |                                                                                                                                                                                                                                                       | All                                                                                                                                                                                                  | Categories used in the analysis                                         |
| Age                | How old are you?                                                                                                                                                                                                                                      | In years                                                                                                                                                                                             | 18-24 years<br>25-34 years<br>35-44 years<br>45-54 years<br>55-64 years |
| Sex                | What sex were you assigned at birth, meaning on your original birth certificate?                                                                                                                                                                      | Female<br>Male                                                                                                                                                                                       | Female<br>Male                                                          |
| Education          | What is the highest level of education you have completed?                                                                                                                                                                                            | Qualifications not listed below, free-text equivalents, Don't Know, Refuse to answer<br>NVQ Level 4-5, HNC, HND, RSA Higher Diploma, BTEC Higher Level, Degree, Higher Degree, free-text equivalents | School level<br>Post school level                                       |
| Income sufficiency | How easy is it to make ends meet?                                                                                                                                                                                                                     | Neither easy nor difficult, Difficult, Very difficult, Don't know, Refuse to answer<br>Very easy, Easy                                                                                               | Not easy<br>Easy                                                        |
| Children           | Do you have any children (including step-children or adopted children) under the age of 18?                                                                                                                                                           | No, Don't know, Refuse to answer<br>Yes                                                                                                                                                              | No<br>Yes                                                               |
| SSB consumption    | [Calculated from Beverage Frequency Questionnaire: reported consumption over last 7 days]                                                                                                                                                             | Any consumption of non-diet Fizzy drinks, Sweetened fruit juice drinks, Regular sports drinks, Regular energy drinks, or Spirits with mixers that have calories<br>No consumption of above           | Consumers<br>Non-consumers                                              |
| Social norms       | People important to me try not to drink sugary drinks                                                                                                                                                                                                 | Neither agree nor disagree, Disagree, Strongly disagree, Don't know, Refuse to answer<br>Strongly agree, Agree                                                                                       | Not agree<br>Agree                                                      |
| Attitudes          | Sugary drinks taste good                                                                                                                                                                                                                              | Strongly agree, Agree<br>Neither agree nor disagree, Disagree, Strongly disagree, Don't know, Refuse to answer                                                                                       | Agree<br>Not agree                                                      |
| Knowledge          | Frequently drinking sugary drinks increases the risk of obesity                                                                                                                                                                                       | False, Don't know, Refuse to answer<br>True                                                                                                                                                          | Not true<br>True                                                        |
| Expert trust       | I trust messages from health experts on sugary drinks                                                                                                                                                                                                 | Neither agree nor disagree, Disagree, Strongly disagree, Don't know, Refuse to answer<br>Strongly agree, Agree                                                                                       | Not agree<br>Agree                                                      |
| Industry trust     | I trust messages from the food and beverage industry on sugary drinks                                                                                                                                                                                 | Neither agree nor disagree, Disagree, Strongly disagree, Don't know, Refuse to answer<br>Strongly agree, Agree                                                                                       | Not agree<br>Agree                                                      |
| Support            | In 2018 a new sugary drink tax will be/was introduced in the UK. This aims to encourage manufacturers to reduce the sugar in drinks. The money will be spent on breakfast clubs, and sports in primary schools. Do you support or oppose this policy? | Strongly support, Support<br>Oppose, Strongly oppose, Don't know, Refuse to answer                                                                                                                   | Support<br>Oppose                                                       |

1  
2  
3  
4  
5  
6  
7  
8  
9  
10  
11  
12  
13  
14  
15  
16  
17  
18  
19  
20  
21  
22  
23  
24  
25  
26  
27  
28  
29  
30  
31  
32  
33  
34  
35  
36  
37  
38  
39  
40  
41  
42  
43  
44  
45  
46  
47

|               |                                                                                     |                                                      |               |
|---------------|-------------------------------------------------------------------------------------|------------------------------------------------------|---------------|
| Effectiveness | Preamble as above. How effective do you think these kinds of policies would be/are? | Somewhat effective, Mostly effective, Very effective | Effective     |
|               |                                                                                     | Not at all effective, Don't know, Refuse to answer   | Not effective |

*Note.* SSB = sugar sweetened beverage; NVQ = National Vocational Qualification; HNC = Higher National Certificate; HND = Higher National Diploma, RSA = Royal Society of Arts; BTEC = Business and Technology Education Council

For peer review only

### *Outcome variables*

The outcome variables of interest were single-item measures of support for, and perceived effectiveness of, the SDIL collapsed into binary categories of support vs oppose and effective vs not-effective as described in Table 1.

### *Exposure variable*

The exposure variable of interest was year – either 2017, 2018 or 2019.

### *Potential confounding variables*

We adjusted for a number of individual-level socio-demographic and psychological variables in the analysis (see Table 1 for details). With the exception of age, education and income sufficiency, these all showed associations with one or both outcome variables in our previous analysis of 2017 data.[34] Given that age and markers of socio-economic position, such as education and income sufficiency, have been previously, if inconsistently, associated with public support for SSB taxes,[11 13 16 18 24-26 29 30] we included them here, despite no relationship with the outcomes in our previous analysis.

We included single-item measures of attitudes, knowledge, and social norms related to sugary drinks; and trust in advice on sugary drinks from health experts and the food and beverage industry. As previous research has indicated that the acceptability of food taxes varies with the stated intentions of these,[9 19 20 27 30 31] we included a preamble to the questions about support for, and perceived effectiveness of, the SDIL outlining the intention of the levy and the stated use of revenue generated.

Socio-demographic variables considered were age in approximately 10-year age bands, sex at birth, whether or not participants had dependent children, and socio-economic position. Parental status was included as the SDIL has been particularly framed in terms of potential benefits for children.[37 41] Socio-economic position was measured using participants' highest educational qualification and perceived income sufficiency. Income sufficiency has previously been associated with financial resources and health outcomes[42] and provides a comparable measure across the range of different economic settings in IFPS.

Current behaviour has previously been associated with perceived acceptability of public health interventions,[33] and we found that SSB consumers were less likely to support the SDIL in 2017. As such, we adjusted for SSB consumption using the Beverage Frequency Questionnaire. This is a 7-day food record that assesses consumption of 17 beverage categories, including caloric and non-caloric beverages.[43] For each beverage category, respondents report the number of drinks and the usual

1  
2  
3 portion size using category-specific images of beverage containers adapted from the Automated Self-  
4 Administered 24 hour (ASA24) dietary assessment tool. Participants who reported any consumption of  
5 regular fizzy drinks, alcoholic drinks with regular mixers or cocktails that have calories, sweetened fruit  
6 drinks, sports drinks, or energy drinks over the previous seven days were considered SSB consumers.  
7  
8  
9

## 10 **Analysis**

11  
12 Data were weighted with post-stratification sample weights constructed using population estimates  
13 from the UK census based on age group, sex and region. These were used throughout the analysis to  
14 reduce the effects of non-response and selection bias. We included 'don't know' and 'refuse to answer'  
15 responses as described in Table 1, meaning there was no missing data.  
16  
17  
18

19  
20 Descriptive statistics were used to quantify all variables of interest. Logistic regression models were  
21 fitted to explore associations between study wave and the binary measures of support for, and  
22 perceived effectiveness of, the SDIL before and after adjustment for other variables. We used separate  
23 models to explore support for the SDIL and perceived effectiveness of the SDIL. In these models support  
24 or perceived effectiveness were the outcome variables, study wave was the exposure variable, and all  
25 other variables in Table 1 were covariates. Standard errors were not clustered. We used the fully  
26 adjusted models, and mean values of covariates, to predict the proportion of the population likely to be  
27 supportive of the SDIL, and think it would be effective, at each time point.  
28  
29  
30  
31  
32

33  
34 Data were analysed using Stata version 15.  
35

## 36 **Ethics**

37  
38 The study received ethical clearance from a University of Waterloo Research Ethics Committee (ORE#  
39 21460 and ORE# 30829). All participants provided informed consent to take part.  
40  
41

## 42 **Patient and public involvement**

43  
44 Patients and the public were not involved in the design, conduct, analysis or interpretation of the study.  
45

## 46 **RESULTS**

47  
48 A total of 25,692 adults took part in IFPS across all included countries in 2017, 28,684 in 2018 and  
49 29,290 in 2019. After removing respondents with missing data on sex at birth and age, and those who  
50 did not meet data quality checks, 18,878 (73.5%) respondents remained in 2017, 22,824 (79.6%) in 2017  
51 and 20,968 (71.6%) in 2019. Of these, 4047 were from the UK in 2017, 5549 in 2018, and 4139 in 2019.  
52  
53 Amongst these UK participants, 3104 (76.7%) met the additional inclusion criteria for the current work  
54  
55  
56  
57  
58  
59  
60



1  
2  
3  
4  
5  
6  
7  
8  
9  
10  
11  
12  
13  
14  
15  
16  
17  
18  
19  
20  
21  
22  
23  
24  
25  
26  
27  
28  
29  
30  
31  
32  
33  
34  
35  
36  
37  
38  
39  
40  
41  
42  
43  
44  
45  
46  
47  
48  
49  
50  
51  
52  
53  
54  
55  
56  
57  
58  
59  
60

(i.e. aged 18-64 years) in 2017, 4118 (74.2%) in 2018, and 3062 (74.0%) in 2019. Characteristics of the analytical sample (after applying survey weights) are described in Table 2.

For peer review only

**Table 2. Weighted unadjusted characteristics of UK participants; International Food Policy Study, 2017-19**

| Concept            | Question wording                                                                                                                                                                                                                                      | Response category | Weighted percentage (95% confidence intervals) |               |               |                 |
|--------------------|-------------------------------------------------------------------------------------------------------------------------------------------------------------------------------------------------------------------------------------------------------|-------------------|------------------------------------------------|---------------|---------------|-----------------|
|                    |                                                                                                                                                                                                                                                       |                   | 2017, n=3104                                   | 2018, n=4118  | 2019, n=3062  | Total, n=10,284 |
| Age                | How old are you?                                                                                                                                                                                                                                      | 18-24 years       | 13 (12 to 15)                                  | 12 (11 to 14) | 11 (10 to 12) | 12 (11 to 13)   |
|                    |                                                                                                                                                                                                                                                       | 25-34 years       | 22 (20 to 23)                                  | 24 (23 to 26) | 22 (20 to 24) | 23 (22 to 24)   |
|                    |                                                                                                                                                                                                                                                       | 35-44 years       | 20 (18 to 22)                                  | 21 (20 to 23) | 23 (22 to 25) | 21 (21 to 22)   |
|                    |                                                                                                                                                                                                                                                       | 45-54 years       | 24 (22 to 26)                                  | 22 (20 to 23) | 20 (19 to 22) | 22 (21 to 23)   |
|                    |                                                                                                                                                                                                                                                       | 55-64 years       | 21 (19 to 23)                                  | 21 (19 to 22) | 23 (22 to 25) | 22 (21 to 22)   |
| Sex                | What sex were you assigned at birth, meaning on your original birth certificate?                                                                                                                                                                      | Female            | 48 (46 to 50)                                  | 50 (48 to 52) | 50 (48 to 52) | 49 (48 to 51)   |
| Education          | What is the highest level of education you have completed?                                                                                                                                                                                            | School level      | 61 (59 to 63)                                  | 74 (72 to 75) | 74 (73 to 76) | 70 (69 to 71)   |
| Income sufficiency | How easy is it to make ends meet?                                                                                                                                                                                                                     | Not easy          | 61 (59 to 63)                                  | 66 (65 to 68) | 66 (64 to 68) | 65 (64 to 66)   |
| Children           | Do you have any children (including step-children or adopted) under 18?                                                                                                                                                                               | No                | 63 (61 to 65)                                  | 68 (66 to 70) | 65 (62 to 67) | 66 (64 to 67)   |
| SSB consumption    | Consumed regular fizzy drinks, sweetened fruit drinks, sports drinks, energy drinks in last week                                                                                                                                                      | Consumers         | 53 (50 to 55)                                  | 44 (42 to 45) | 44 (42 to 47) | 46 (45 to 48)   |
| Social norms       | People important to me try not to drink sugary drinks                                                                                                                                                                                                 | Not agree         | 46 (44 to 48)                                  | 52 (50 to 54) | 51 (48 to 53) | 50 (48 to 51)   |
| Attitudes          | Sugary drinks taste good                                                                                                                                                                                                                              | Agree             | 62 (60 to 64)                                  | 64 (63 to 66) | 59 (57 to 61) | 62 (61 to 63)   |
| Knowledge          | Frequently drinking sugary drinks increases the risk of obesity                                                                                                                                                                                       | Not true          | 10 (9 to 12)                                   | 14 (13 to 16) | 12 (10 to 13) | 12 (12 to 13)   |
| Expert trust       | I trust messages from health experts on sugary drinks                                                                                                                                                                                                 | Not agree         | 39 (37 to 41)                                  | 40 (38 to 42) | 41 (39 to 43) | 40 (39 to 41)   |
| Industry trust     | I trust messages from the food and beverage industry on sugary drinks                                                                                                                                                                                 | Not agree         | 73 (71 to 75)                                  | 69 (67 to 70) | 68 (66 to 70) | 70 (69 to 71)   |
| Support            | In 2018 a new sugary drink tax will be/was introduced in the UK. This aims to encourage manufacturers to reduce the sugar in drinks. The money will be spent on breakfast clubs, and sports in primary schools. Do you support or oppose this policy? | Support           | 70 (68 to 72)                                  | 66 (64 to 68) | 66 (64 to 68) | 67 (66 to 68)   |
| Effectiveness      | Preamble as above. How effective do you think these kinds of policies are?                                                                                                                                                                            | Effective         | 71 (69 to 73)                                  | 66 (64 to 67) | 65 (63 to 67) | 67 (66 to 68)   |

Note. SSB = sugar sweetened beverage

1  
2  
3 Table 3 shows the results of logistic regression analyses of associations between survey wave and  
4 support for, and perceived effectiveness of, the SDIL, before and after adjusting for the socio-  
5 demographic and psychological concepts listed. In unadjusted analyses, both support for, and perceived  
6 effectiveness of, the SDIL dropped between 2017 and 2018, but there was little difference in effect  
7 estimates in 2018 vs 2017 and in 2019 vs 2017.  
8  
9

10  
11  
12 In adjusted analyses there was no evidence that the proportion of participants supporting the SDIL  
13 changed between 2017 and either 2018 or 2019. In contrast, the proportion who perceived the SDIL to  
14 be effective in 2018 and 2019 was lower than that in 2017. However, the difference in the proportion  
15 who perceived the SDIL to be effective was very similar in 2018 vs 2017 and 2019 vs 2017 indicating that  
16 the decreased in perceived effectiveness occurred between 2017 and 2018.  
17  
18  
19

20  
21 Holding all other variables at their mean levels, the adjusted logistic regression model predicted that  
22 70% (95% CI: 68 to 72) of participants supported the SDIL in 2017, 68% (95% CI: 67 to 70%) in 2018, and  
23 68% (95% CI: 66 to 70) in 2019 (Figure 1). Comparable figures for perceived effectiveness were 72%  
24 (95% CI: 70 to 74) in 2017, 67% (95% CI: 65 to 69) in 2018, and 67% (95% CI: 64 to 69) in 2019 (Figure 1).  
25  
26  
27

28  
29 Other variables in the adjusted models were also associated with support for, and perceived  
30 effectiveness of, the SDIL (Table 3). Greater support for the SDIL was associated with: having a higher  
31 level of education, not having children at home, being a non-consumer of SSBs, having social norms to  
32 avoid sugary drinks, disliking the taste of sugary drinks, recognising an association between sugary  
33 drinks and obesity, trusting health expert messages on sugary drinks and not trusting industry messages  
34 on sugary drinks. Individuals aged 35-64 years were also more likely to support the SDIL than those aged  
35 18-24 years, with some evidence of a step wise increase in likelihood of support across successive age  
36 groups. Greater perceived effectiveness of the SDIL was associated with: having children at home,  
37 having social norms to avoid sugary drinks, disliking the taste of sugary drinks, trusting health expert  
38 messages on sugary drinks and trusting industry messages on sugary drinks. Individuals aged 25-64 years  
39 were also less likely to perceive the SDIL to be effective. There was a stepwise decrease in perceived  
40 effectiveness across successive age groups to age 54 years, but not thereafter.  
41  
42  
43  
44  
45  
46  
47  
48  
49  
50  
51  
52  
53  
54  
55  
56  
57  
58  
59  
60

**Table 3. Adjusted odds ratios (95% confidence intervals) of the association between year and support for, and perceived effectiveness of, the Soft Drinks Industry Levy; International Food Policy Study, 2017-19**

| Concept            | Question wording (where applicable)                                                              | Response category | Support for the SDIL       |                            | Perceived effectiveness of the SDIL |                            |
|--------------------|--------------------------------------------------------------------------------------------------|-------------------|----------------------------|----------------------------|-------------------------------------|----------------------------|
|                    |                                                                                                  |                   | Unadjusted                 | Adjusted                   | Unadjusted                          | Adjusted                   |
| Survey wave        | Not applicable                                                                                   | 2017              | Reference                  | Reference                  | Reference                           | Reference                  |
|                    |                                                                                                  | 2018              | <b>0.84 (0.75 to 0.95)</b> | 0.93 (0.81 to 1.05)        | <b>0.77 (0.68 to 0.87)</b>          | <b>0.78 (0.69 to 0.88)</b> |
|                    |                                                                                                  | 2019              | <b>0.84 (0.74 to 0.96)</b> | 0.90 (0.78 to 1.03)        | <b>0.76 (0.67 to 0.87)</b>          | <b>0.76 (0.66 to 0.86)</b> |
| Age                | How old are you?                                                                                 | 18-24             |                            | Reference                  |                                     | Reference                  |
|                    |                                                                                                  | 25-34             |                            | 1.07 (0.89 to 1.28)        |                                     | <b>0.75 (0.61 to 0.91)</b> |
|                    |                                                                                                  | 35-44             |                            | <b>1.28 (1.06 to 1.55)</b> |                                     | <b>0.50 (0.41 to 0.62)</b> |
|                    |                                                                                                  | 45-54             |                            | <b>1.57 (1.30 to 1.90)</b> |                                     | <b>0.46 (0.37 to 0.56)</b> |
|                    |                                                                                                  | 55-64             |                            | <b>1.81 (1.50 to 2.19)</b> |                                     | <b>0.47 (0.39 to 0.58)</b> |
| Sex                | What sex were you assigned at birth, meaning on your original birth certificate?                 | Female            |                            | Reference                  |                                     | Reference                  |
|                    |                                                                                                  | Male              |                            | 1.01 (0.92 to 1.13)        |                                     | 1.05 (0.95 to 1.16)        |
| Education          | What is the highest level of education you have completed?                                       | School level      |                            | Reference                  |                                     | Reference                  |
|                    |                                                                                                  | Post school level |                            | <b>1.19 (1.07 to 1.32)</b> |                                     | 1.02 (0.92 to 1.13)        |
| Income sufficiency | How easy is it to make ends meet?                                                                | Not easy          |                            | Reference                  |                                     | Reference                  |
|                    |                                                                                                  | Easy              |                            | 1.07 (0.96 to 1.20)        |                                     | 1.02 (0.92 to 1.14)        |
| Dependent children | Do you have any children (including step-children or adopted children) under 18?                 | No                |                            | Reference                  |                                     | Reference                  |
|                    |                                                                                                  | Yes               |                            | <b>0.82 (0.73 to 0.92)</b> |                                     | <b>1.21 (1.07 to 1.36)</b> |
| SSB consumption    | Consumed regular fizzy drinks, sweetened fruit drinks, sports drinks, energy drinks in last week | Consumers         |                            | Reference                  |                                     | Reference                  |
|                    |                                                                                                  | Non-consumers     |                            | <b>1.12 (1.01 to 1.25)</b> |                                     | 1.01 (0.91 to 1.12)        |
| Social norms       | People important to me try not to drink sugary drinks                                            | Not agree         |                            | Reference                  |                                     | Reference                  |
|                    |                                                                                                  | Agree             |                            | <b>1.35 (1.21 to 1.50)</b> |                                     | <b>1.35 (1.21 to 1.50)</b> |
| Attitudes          | Sugary drinks taste good                                                                         | Agree             |                            | Reference                  |                                     | Reference                  |
|                    |                                                                                                  | Not agree         |                            | <b>1.32 (1.21 to 1.50)</b> |                                     | <b>1.33 (1.19 to 1.48)</b> |
| Knowledge          | Frequently drinking sugary drinks increases the risk of obesity                                  | Not true          |                            | Reference                  |                                     | Reference                  |
|                    |                                                                                                  | True              |                            | <b>2.78 (2.37 to 3.27)</b> |                                     | <b>1.26 (1.07 to 1.48)</b> |
| Expert trust       | I trust messages from health experts on                                                          | Not agree         |                            | Reference                  |                                     | Reference                  |

1  
2  
3  
4  
5  
6  
7  
8  
9  
10  
11  
12  
13  
14  
15  
16  
17  
18  
19  
20  
21  
22  
23  
24  
25  
26  
27  
28  
29  
30  
31  
32  
33  
34  
35  
36  
37  
38  
39  
40  
41  
42  
43  
44  
45  
46  
47

|                |                                                                       |           |                            |                            |
|----------------|-----------------------------------------------------------------------|-----------|----------------------------|----------------------------|
|                | sugary drinks                                                         | Agree     | <b>2.36 (2.09 to 2.66)</b> | <b>1.96 (1.75 to 2.19)</b> |
| Industry trust | I trust messages from the food and beverage industry on sugary drinks | Not agree | Reference                  | Reference                  |
|                |                                                                       | Agree     | <b>0.72 (0.63 to 0.82)</b> | <b>1.53 (1.34 to 1.74)</b> |

Note. SDIL = Soft Drinks Industry Levy; **BOLD** indicates statistically significant at the p<0.05 level; adjusted for all concepts listed

For peer review only

## DISCUSSION

### Summary of findings

As far as we are aware, this is the first study to explore whether public acceptability of an SSB tax, operationalised in terms of support and perceived effectiveness, changed from before to after implementation of the tax. It also adds to the small existing literature on public acceptability of implemented (rather than hypothetical) SSB taxes.[28 30 34 35] In this population-based, repeat cross-sectional survey, after adjustment for a range of socio-demographic and psychological covariates, we found that predicted support for the SDIL remained consistently high throughout (68-70%), with no evidence that support changed from four months before to 20 months after implementation. Whilst perceived effectiveness of the SDIL was also high throughout (67-72%), there was evidence that predicted perceived effectiveness of the SDIL decreased from 72% before implementation to 67% after implementation. This change was evident 7-8 months after implementation, with no further decrease 12 months later.

### Strengths and weaknesses of methods

Key strengths of the analysis are the large (relatively to other work in the field)[9], population-based, sample; inclusion of a range of socio-demographic, consumption and psychological variables; the context of an implemented, rather than hypothetical, SSB tax in the latter two time points; and consistency of methods across all three time points. Given previous findings showing that support for SSB taxes is greater when revenues are used for health-promoting activities,[9 19 20 27 30 31] we were careful to present the SDIL with revenues ear-marked for health-promotion activities. We also clearly stated that it was an intervention designed to target manufacturers rather than consumers. Social desirability bias may also be less likely to occur in more anonymous settings such as on-line surveys.[44]

Participants were recruited using non-probability sampling. Despite the use of weights for age, sex and region, the findings do not necessarily provide nationally representative estimates; and are limited to ages 18-64 years. Whilst the pattern of results in terms of patterns of associations between variables are likely to be generalizable to the UK, the estimates of absolute frequency may not be. Given international differences in dietary public health policy,[45] the pattern of findings may not be generalizable beyond the UK. Although the IFPS takes place in a number of countries key questions used here were only asked of UK participants. All data were collected after announcement of the SDIL in March 2016.

1  
2  
3 All variables were self-reported. Whilst all have strong face validity and the Beverage Frequency  
4 Questionnaire performs well compared to a seven day food record,[43] we have not explored validity or  
5 reliability of the other measures used. However, many were derived from existing instruments. Further,  
6 we were reliant on data availability and did not have consistent information across all three included  
7 waves on additional variables that may of relevance including: household income, age of children in the  
8 household and personality traits such as extraversion, agreeableness, conscientiousness, neuroticism or  
9 openness to experience. Although adults aged 65 years and older were included in IFPS from 2018  
10 onwards, they were not in 2017.

### 16 **Comparison to previous results and interpretation of findings**

17  
18  
19 Overall, there was high support for the SDIL throughout with no evidence of significant change across  
20 years. The 68-70% prevalence of support we found is noticeably higher than the previously reported  
21 ranges of 35-60%[11-27] and a pooled estimate of 42%.[9] We propose three potential reasons why  
22 support here may be higher than previously reported. Firstly, most previous data on support for SSB  
23 taxes has been collected in the context of hypothetical taxes. Previous systematic review evidence  
24 suggests that support for governmental public health interventions tends to increase after  
25 implementation.[33] Whilst 2017 data was collected four months prior to implementation of the SDIL,  
26 the policy intention was announced in March 2016, 20 months before 2017 data collection. As such,  
27 many participants may have either believed the SDIL had already been implemented, or at least  
28 accepted that it was going to be implemented, at the time of 2017 data collection. Comparable pre-  
29 announcement data is not available.

30  
31  
32 Secondly, other than our previous work using the 2017 data, the only other study of support for the SDIL  
33 focused particularly on parents.[35] This found that 1-3 months after implementation 57% of parents  
34 supported what the SDIL was trying to achieve 1-3 months after implementation. We found that those  
35 with dependent children were less likely to support the SDIL than those without (overall adjusted  
36 predicted support was 70% (95% CI: 69 to 72) in those without children, and 66% (95% CI: 64 to 68) in  
37 those with children) meaning that our sample including both those with and without dependent children  
38 would likely have higher support than one focused exclusively on parents.

39  
40  
41 Finally, previous research has found that support for SSB taxes consistently increases when it is made  
42 clear that revenues will be used for health promotion.[9 19 20 27 30 31] We indicated that the  
43 government's stated intention for SDIL revenues was to spend them "on breakfast clubs, and sports in  
44 primary schools". This may have increased support compared to others studies.

1  
2  
3 Whilst perceived effectiveness also remained high throughout, it decreased from 72% in 2017 to 67% in  
4 2018 and 2019. We propose three potential explanations. Firstly, it is possible that the initial decrease in  
5 perceived effectiveness reflects an assumption that the levy achieves its effects via price increases,  
6 coupled with limited experience of price increases. The Government's stated (and achieved) aim of the  
7 SDIL was to prompt reformulation and we were careful to state this in the survey.[38] Despite this, many  
8 people may find it difficult to dissociate the concept of 'tax' from price increases and so assume that this  
9 is how the levy achieves its effects. This may have been reinforced by temporary signage in stores in  
10 spring 2018 explaining that any recent price increases were due to the levy.[46] The true effect of the  
11 SDIL on SSB prices was not straightforward with some taxed categories increasing in price and others  
12 decreasing.[38] Further, only 44% of parents reported noticing an increase in SSB prices following SDIL  
13 implementation.[35] Nevertheless, if participants believed the levy would only work if it increased prices  
14 and they did not consistently experience price increases, they could well conclude it was less effective  
15 than they would have predicted prior to implementation. Secondly, the drop in perceived effectiveness  
16 between 2017 (pre-implementation) and 2018 (post-implementation) may reflect the difference  
17 between a hypothetical and implemented tax, and that despite similar wording, the measures of  
18 perceived effectiveness used in these years were not entirely comparable. Finally, media framing of the  
19 SDIL may have changed over time, influencing perceptions of its effectiveness. Although there have  
20 been analyses of media coverage of the announcement of the SDIL, we are not aware of any work that  
21 has tracked this longitudinally.[47 48]

22  
23  
24  
25  
26  
27  
28  
29  
30  
31  
32  
33  
34  
35  
36  
37  
38  
39  
40  
41  
42  
43  
44  
45  
46  
47  
48  
49  
50  
51  
52  
53  
54  
55  
56  
57  
58  
59  
60  
The associations between socio-demographic and psychological covariates and both support for and  
perceived effectiveness of the SDIL largely reflect those reported in our previous analysis.[34] As these  
associations were not the focus of the present work, we refer readers there for a fuller consideration of  
the interpretation of these associations. In brief, the patterns found largely reflect an intuitive  
association between more 'public health' orientated attitudes and beliefs and acceptability of the SDIL.

### **Implications of findings**

Many structural public health interventions, such as SSB taxes, require government action. This means  
that political support is an important determinant of implementation of such interventions. Public  
acceptability may be one important influence on political support. Public acceptability may not just  
impact on short term effectiveness via mechanisms such as cross-border shopping, but also on tax  
longevity and hence long-term effectiveness. Even when written into legislation such interventions are  
not necessarily immutable. For example, the SSB tax in Chicago, IL was repealed two months after



1  
2  
3 implementation,[6] and a tax on high fat products in Denmark was repealed after a year.[7] In the UK, a  
4 proposed tax increase on hot baked goods (the 'pasty tax') was abandoned before implementation  
5 following a public outcry.[8] Given this history of repeal of structural interventions, public acceptability  
6 is likely to be an important determinant not just of initial implementation but of ongoing longevity and  
7 hence long-term impact. That public support for, and perceived effectiveness of, the SDIL remains high  
8 even after implementation may help it persist and give confidence to policymakers elsewhere that SSB  
9 taxes, and other structural public health interventions, can have high and ongoing public acceptability.  
10 This may be particularly important with the recent move in the UK towards more structural policies to  
11 address obesity in the last five years.[49]

12  
13 Given our finding of a small drop in perceived effectiveness between before and after implementation  
14 of the SDIL, it may be valuable to continue to monitor this. Greater understanding of what makes  
15 effective structural public health interventions more and less attractive to the public, and how they can  
16 be framed to increased acceptability is also required.

## 27 **CONCLUSIONS**

28 We found high levels of support for the SDIL amongst UK adults and no evidence that this changed  
29 between four months before implementation and 20 months after. We also found that perceived  
30 effectiveness of the SDIL remained high, but there was evidence of a small decrease after  
31 implementation in 2018. This may relate to reported complexities in the impact of the SDIL on SSB prices  
32 and the difference between reporting on perceived effectiveness of a hypothetical versus implemented  
33 policy. Whilst public acceptability of structural public health interventions is recognised as an important  
34 determinant of implementation, it may also be an important determinant of policy persistence. Greater  
35 understanding of influences on public acceptability of structural public health interventions such as SSB  
36 taxes, and how it can be increased, is required.

## FIGURE LEGEND

**Figure 1. Predicted percentage (95% confidence intervals) of participants who supported (left) and perceived the Soft Drinks Industry Levy to be effective (right); International Food Policy Study, 2017-19**

## FUNDING

Funding for this project was provided by a Canadian Institutes of Health Research (CIHR) Project Grant (PJT-162167). Additional support was provided by an International Health Grant from the Public Health Agency of Canada (PHAC, no grant number available), and a PHAC - CIHR Chair in Applied Public Health (no grant number available). Collection of 2017 and 2018 UK data collection was supported by the Health Foundation (no grant numbers available). JA & MW are supported by the Medical Research Council (grant number MC\_UU\_00006/7) and the Centre for Diet and Activity Research (CEDAR) which is a UKCRC Public Health Research Centre of Excellence (grant number MR/K023187/1): funding for CEDAR from the British Heart Foundation, Cancer Research UK, Economic and Social Research Council, Medical Research Council, the National Institute for Health Research, and the Wellcome Trust, under the auspices of the UK Clinical Research Collaboration, is gratefully acknowledged. Views expressed in this paper are those of the authors and not necessarily those of the above named funders. The study has no affiliations with the food industry.

## COMPETING INTERESTS

None declared

## AUTHOR CONTRIBUTIONS

JA, DP & MW conceived the idea for this paper. JA analysed the data and drafted the manuscript. JA, TP, MW, DH and LV read and provided critical comments on the manuscript and approved the final version. DH conceived the idea for the IFPS and secured funding. DH and LV developed the first draft of survey. TP led the further development of the UK survey instrument, with input from JA, MW, DH and LV.

## DATA SHARING

Data is available directly from the International Food Policy Study team on reasonable request (see [www.foodpolicystudy.com](http://www.foodpolicystudy.com)).

## REFERENCES

1. World Health Organization. Tackling NCDs: “Best Buys” and Other Recommended Interventions for the Prevention and Control of Noncommunicable Diseases. Geneva, Switzerland: WHO, 2017.
2. Teng AM, Jones AC, Mizdrak A, Signal L, Genç M, Wilson N. Impact of sugar-sweetened beverage taxes on purchases and dietary intake: Systematic review and meta-analysis. *Obesity Reviews* 2019;**20**:1187-204.
3. Allcott H, Lockwood BB, Taubinsky D. Should We Tax Sugar-Sweetened Beverages? An Overview of Theory and Evidence. *Journal of Economic Perspectives* 2019;**33**:202-27.
4. White M, Adams J. Different scientific approaches are needed to generate stronger evidence for population health improvement. *PLOS Medicine* 2018;**15**:e1002639.
5. Le Bodo Y, Paquette M-C, De Wals P. Social and Political Acceptability of Sugar-Sweetened Beverage Taxation. *Taxing Soda for Public Health: A Canadian Perspective*. Cham: Springer International Publishing, 2016:193-212.
6. Powell LM, Leider J. Evaluation of Changes in Beverage Prices and Volume Sold Following the Implementation and Repeal of a Sweetened Beverage Tax in Cook County, Illinois. *JAMA Network Open* 2020;**3**:e2031083-e83.
7. Stafford N. Denmark cancels “fat tax” and shelves “sugar tax” because of threat of job losses. *BMJ* 2012;**345**:e7889.
8. Robinson M. P-Day! Victory for pasty eaters everywhere as U-turn ends threat of 50p VAT increase (as long as you eat at Greggs or don't mind a lukewarm one) 2012.  
<https://www.dailymail.co.uk/news/article-2151287/Pasty-tax-U-turn-ends-threat-50p-VAT-increase-long-eat-Greggs-dont-mind-lukewarm-one.html#ixzz1wN1mjr9H>. Accessed 10 Feb 2021
9. Eykelenboom M, van Stralen MM, Olthof MR, et al. Political and public acceptability of a sugar-sweetened beverages tax: a mixed-method systematic review and meta-analysis. *Int J Behav Nutr Phys Act* 2019;**16**:78.
10. Reynolds JP, Stautz K, Pilling M, van der Linden S, Marteau TM. Communicating the effectiveness and ineffectiveness of government policies and their impact on public support: a systematic review with meta-analysis. *Royal Society Open Science* 2020;**7**:190522.
11. Rivard C, Smith D, McCann SE, Hyland A. Taxing sugar-sweetened beverages: a survey of knowledge, attitudes and behaviours. *Public health nutrition* 2012;**15**:1355-61.
12. Barry CL, Niederdeppe J, Gollust SE. Taxes on sugar-sweetened beverages: results from a 2011 national public opinion survey. *American journal of preventive medicine* 2013;**44**:158-63.
13. Donaldson EA, Cohen JE, Rutkow L, Villanti AC, Kanarek NF, Barry CL. Public support for a sugar-sweetened beverage tax and pro-tax messages in a Mid-Atlantic US state. *Public health nutrition* 2015;**18**:2263-73.

14. Jou J, Niederdeppe J, Barry CL, Gollust SE. Strategic messaging to promote taxation of sugar-sweetened beverages: lessons from recent political campaigns. *American journal of public health* 2014;**104**:847-53.
15. Niederdeppe J, Gollust SE, Jarlenski MP, Nathanson AM, Barry CL. News coverage of sugar-sweetened beverage taxes: pro- and antitax arguments in public discourse. *American journal of public health* 2013;**103**:e92-8.
16. Simon PA, Chiang C, Lightstone AS, Shih M. Public Opinion on Nutrition-Related Policies to Combat Child Obesity, Los Angeles County, 2011. *Preventing Chronic Disease* 2014;**11**:E96.
17. Somerville C, Marteau TM, Kinmonth AL, Cohn S. Public attitudes towards pricing policies to change health-related behaviours: a UK focus group study. *European Journal of Public Health* 2015;**25**:1058-64.
18. Petrescu D, Hollands G, Couturier D, Ng Y, Marteau T. Public acceptability in the UK and USA of nudging to reduce obesity: The example of reducing sugar-sweetened beverages consumption. *PLoS ONE* 2016;**11**:1-18.
19. Thomas-Meyer M, Mytton O, Adams J. Public responses to proposals for a tax on sugar-sweetened beverages: A thematic analysis of online reader comments posted on major UK news websites. *PLOS ONE* 2017;**12**:e0186750.
20. Timpson H, Lavin R, Hughes L. Exploring the Acceptability of a Tax on Sugar-Sweetened Beverages: Insight Work. Liverpool: Centre for Public Health, Liverpool John Moores University, 2013.
21. Beeken RJ, Wardle J. Public beliefs about the causes of obesity and attitudes towards policy initiatives in Great Britain. *Public health nutrition* 2013;**16**:2132-7.
22. Cancer Research UK, UK Health Forum. Short and sweet: why the government should introduce a sugary drinks tax in the UK. London, 2016.
23. ComRes. Daily Mail sugar tax poll 2015. <http://www.comres.co.uk/polls/daily-mail-sugar-tax-poll/>. Accessed 2 March 2016
24. Ipsos Mori Social Research Institute. Great Britain: The way we live now. Understanding Society 2013;**December 2013**.
25. Curry LE, Rogers T, Williams P, Homs G, Willett J, Schmitt CL. Public Attitudes and Support for a Sugar-Sweetened Beverage Tax in America's Heartland. *Health promotion practice* 2017;**19**:418-26.
26. Fatemi M, Murray R, Langley T. Public acceptance of obesity prevention policies in the UK. *Journal of Cancer Policy* 2020;**27**:100256.
27. Cullerton K, Baker P, Adsett E, Lee A. What do the Australian public think of regulatory nutrition policies? A scoping review. *Obesity Reviews* 2021;**22**:e13106.
28. Kwon J, Cameron AJ, Hammond D, et al. A multi-country survey of public support for food policies to promote healthy diets: Findings from the International Food Policy Study. *BMC Public Health* 2019;**19**:1205.

- 1
- 2
- 3 29. Gollust SE, Barry CL, Niederdeppe J. Americans' opinions about policies to reduce consumption of
- 4 sugar-sweetened beverages. *Preventive Medicine* 2014;**63**:52-57.
- 5
- 6 30. Julia C, Mejean C, Vicari F, Peneau S, Hercberg S. Public perception and characteristics related to
- 7 acceptance of the sugar-sweetened beverage taxation launched in France in 2012. *Public health*
- 8 *nutrition* 2015;**18**:2679-88.
- 9
- 10 31. Moretto N, Kendall E, Whitty J, et al. Yes, the government should tax soft drinks: findings from a
- 11 citizens' jury in Australia. *International journal of environmental research and public health*
- 12 2014;**11**:2456-71.
- 13
- 14 32. Rowbotham S, McKinnon M, Marks L, Hawe P. Research on media framing of public policies to
- 15 prevent chronic disease: A narrative synthesis. *Social Science & Medicine* 2019;**237**:112428.
- 16
- 17 33. Diepeveen S, Ling T, Suhrcke M, Roland M, Marteau T. Public acceptability of government
- 18 intervention to change health-related behaviours: a systematic review and narrative synthesis.
- 19 *BMC Public Health* 2013;**13**:756.
- 20
- 21 34. Pell D, Penney T, Hammond D, Vanderlee L, White M, Adams J. Support for, and perceived
- 22 effectiveness of, the UK soft drinks industry levy among UK adults: cross-sectional analysis of the
- 23 International Food Policy Study. *BMJ Open* 2019;**9**:e026698.
- 24
- 25 35. Gillison F, Grey E, Griffin T. Parents' Perceptions and Responses to the UK Soft Drinks Industry Levy. *J*
- 26 *Nutr Educ Behav* 2020;**52**:626-31.
- 27
- 28 36. HM Revenue & Customs. Soft Drinks Industry Levy 2016.
- 29 [https://www.gov.uk/government/publications/soft-drinks-industry-levy/soft-drinks-industry-](https://www.gov.uk/government/publications/soft-drinks-industry-levy/soft-drinks-industry-levy)
- 30 [levy](https://www.gov.uk/government/publications/soft-drinks-industry-levy/soft-drinks-industry-levy). Accessed 5 December
- 31
- 32 37. Gauke D. Budget 2016. London: HM Treasury, 2016.
- 33
- 34 38. Scarborough P, Adhikari V, Harrington RA, et al. Impact of the announcement and implementation of
- 35 the UK Soft Drinks Industry Levy on sugar content, price, product size and number of available
- 36 soft drinks in the UK, 2015-19: A controlled interrupted time series analysis. *PLoS Medicine*
- 37 2020;**17**:e1003025.
- 38
- 39 39. Pell D, Mytton O, Penney T, et al. Changes in British household purchases of soft drinks associated
- 40 with implementation of the Soft Drinks Industry Levy: a controlled interrupted time series
- 41 analysis. *BMJ* 2021;**372**:doi:10.1136/bmj.n254.
- 42
- 43 40. The American Association for Public Opinion Research. Standard Definitions: Final Dispositions of
- 44 Case Codes and
- 45 Outcome Rates for Surveys 2016. [https://www.aapor.org/AAPOR\\_Main/media/publications/Standard-](https://www.aapor.org/AAPOR_Main/media/publications/Standard-Definitions20169theditionfinal.pdf)
- 46 [Definitions20169theditionfinal.pdf](https://www.aapor.org/AAPOR_Main/media/publications/Standard-Definitions20169theditionfinal.pdf). Accessed 2 July 2021
- 47
- 48 41. HM Government. Childhood Obesity: A Plan for Action, 2016.
- 49
- 50 42. Litwin H, Sapir EV. Perceived Income Adequacy Among Older Adults in 12 Countries: Findings From
- 51 the Survey of Health, Ageing, and Retirement in Europe. *The Gerontologist* 2009;**49**:397-406.
- 52
- 53 43. Vanderlee L, Reid JL, White CM, et al. Evaluation of the online Beverage Frequency Questionnaire
- 54 (BFQ). *Nutr J* 2018;**17**:73.
- 55
- 56
- 57
- 58
- 59
- 60

- 1  
2  
3 44. Adams J, Bateman B, Becker F, et al. Effectiveness and acceptability of parental financial incentives  
4 and quasi-mandatory schemes for increasing uptake of vaccinations in preschool children:  
5 systematic review, qualitative study and discrete choice experiment. Health technology  
6 assessment (Winchester, England) 2015;**19**:1-176.  
7
- 8 45. Vanderlee L, White CM, Kirkpatrick SI, et al. Non-alcoholic and alcoholic beverage intakes by adults  
9 across five upper-middle and high-income countries. Journal of Nutrition 2021;**151**:140-51.  
10
- 11 46. Smith G. More than 300 businesses hit by sugar tax - but revenues will be half expected 2018.  
12 <https://www.newfoodmagazine.com/news/72139/more-than-300-sugar-tax/>. Accessed 10 Feb  
13 2021  
14
- 15 47. Buckton CH, Fergie G, Leifeld P, Hilton S. A discourse network analysis of UK newspaper coverage of  
16 the "sugar tax" debate before and after the announcement of the Soft Drinks Industry Levy.  
17 BMC Public Health 2019;**19**:490.  
18
- 19 48. Buckton CH, Patterson C, Hyseni L, et al. The palatability of sugar-sweetened beverage taxation: A  
20 content analysis of newspaper coverage of the UK sugar debate. PLoS One 2018;**13**:e0207576.  
21
- 22 49. Theis DRZ, White M. Is Obesity Policy in England Fit for Purpose? Analysis of Government Strategies  
23 and Policies, 1992-2020. The Milbank quarterly 2021;**99**:126-70.  
24  
25  
26  
27  
28  
29  
30  
31  
32  
33  
34  
35  
36  
37  
38  
39  
40  
41  
42  
43  
44  
45  
46  
47  
48  
49  
50  
51  
52  
53  
54  
55  
56  
57  
58  
59  
60

1  
2  
3  
4  
5  
6  
7  
8  
9  
10  
11  
12  
13  
14  
15  
16  
17  
18  
19  
20  
21  
22  
23  
24  
25  
26  
27  
28  
29  
30  
31  
32  
33  
34  
35  
36  
37  
38  
39  
40  
41  
42  
43  
44  
45  
46  
47  
48  
49  
50  
51  
52  
53  
54  
55  
56  
57  
58  
59  
60



Predicted percentage (95% confidence intervals) of participants who supported (left) and perceived the Soft Drinks Industry Levy to be effective (right); International Food Policy Study, 2017-19

124x96mm (96 x 96 DPI)

STROBE Statement—Checklist of items that should be included in reports of *cross-sectional studies*

|                              | Item No | Recommendation                                                                                                                                                                                               | Page No |
|------------------------------|---------|--------------------------------------------------------------------------------------------------------------------------------------------------------------------------------------------------------------|---------|
| <b>Title and abstract</b>    | 1       | (a) Indicate the study's design with a commonly used term in the title or the abstract                                                                                                                       | 1       |
|                              |         | (b) Provide in the abstract an informative and balanced summary of what was done and what was found                                                                                                          | 2       |
| <b>Introduction</b>          |         |                                                                                                                                                                                                              |         |
| Background/rationale         | 2       | Explain the scientific background and rationale for the investigation being reported                                                                                                                         | 4-5     |
| Objectives                   | 3       | State specific objectives, including any prespecified hypotheses                                                                                                                                             | 5       |
| <b>Methods</b>               |         |                                                                                                                                                                                                              |         |
| Study design                 | 4       | Present key elements of study design early in the paper                                                                                                                                                      | 6       |
| Setting                      | 5       | Describe the setting, locations, and relevant dates, including periods of recruitment, exposure, follow-up, and data collection                                                                              | 6       |
| Participants                 | 6       | (a) Give the eligibility criteria, and the sources and methods of selection of participants                                                                                                                  | 6       |
| Variables                    | 7       | Clearly define all outcomes, exposures, predictors, potential confounders, and effect modifiers. Give diagnostic criteria, if applicable                                                                     | 6-8     |
| Data sources/<br>measurement | 8*      | For each variable of interest, give sources of data and details of methods of assessment (measurement). Describe comparability of assessment methods if there is more than one group                         | 6-8     |
| Bias                         | 9       | Describe any efforts to address potential sources of bias                                                                                                                                                    | 6-9     |
| Study size                   | 10      | Explain how the study size was arrived at                                                                                                                                                                    | 6       |
| Quantitative variables       | 11      | Explain how quantitative variables were handled in the analyses. If applicable, describe which groupings were chosen and why                                                                                 | 6-9     |
| Statistical methods          | 12      | (a) Describe all statistical methods, including those used to control for confounding                                                                                                                        | 9       |
|                              |         | (b) Describe any methods used to examine subgroups and interactions                                                                                                                                          | NA      |
|                              |         | (c) Explain how missing data were addressed                                                                                                                                                                  | 7       |
|                              |         | (d) If applicable, describe analytical methods taking account of sampling strategy                                                                                                                           | 9       |
|                              |         | (e) Describe any sensitivity analyses                                                                                                                                                                        | NA      |
| <b>Results</b>               |         |                                                                                                                                                                                                              |         |
| Participants                 | 13*     | (a) Report numbers of individuals at each stage of study—eg numbers potentially eligible, examined for eligibility, confirmed eligible, included in the study, completing follow-up, and analysed            | 9       |
|                              |         | (b) Give reasons for non-participation at each stage                                                                                                                                                         | 9       |
|                              |         | (c) Consider use of a flow diagram                                                                                                                                                                           | NA      |
| Descriptive data             | 14*     | (a) Give characteristics of study participants (eg demographic, clinical, social) and information on exposures and potential confounders                                                                     | 10      |
|                              |         | (b) Indicate number of participants with missing data for each variable of interest                                                                                                                          | 10      |
| Outcome data                 | 15*     | Report numbers of outcome events or summary measures                                                                                                                                                         | 10      |
| Main results                 | 16      | (a) Give unadjusted estimates and, if applicable, confounder-adjusted estimates and their precision (eg, 95% confidence interval). Make clear which confounders were adjusted for and why they were included | 12      |



1  
2  
3  
4  
5  
6  
7  
8  
9  
10  
11  
12  
13  
14  
15  
16  
17  
18  
19  
20  
21  
22  
23  
24  
25  
26  
27  
28  
29  
30  
31  
32  
33  
34  
35  
36  
37  
38  
39  
40  
41  
42  
43  
44  
45  
46  
47  
48  
49  
50  
51  
52  
53  
54  
55  
56  
57  
58  
59  
60

|                          |    |                                                                                                                                                                            |       |
|--------------------------|----|----------------------------------------------------------------------------------------------------------------------------------------------------------------------------|-------|
|                          |    | (b) Report category boundaries when continuous variables were categorized                                                                                                  | 7     |
|                          |    | (c) If relevant, consider translating estimates of relative risk into absolute risk for a meaningful time period                                                           | NA    |
| Other analyses           | 17 | Report other analyses done—eg analyses of subgroups and interactions, and sensitivity analyses                                                                             | NA    |
| <b>Discussion</b>        |    |                                                                                                                                                                            |       |
| Key results              | 18 | Summarise key results with reference to study objectives                                                                                                                   | 13    |
| Limitations              | 19 | Discuss limitations of the study, taking into account sources of potential bias or imprecision. Discuss both direction and magnitude of any potential bias                 | 13-14 |
| Interpretation           | 20 | Give a cautious overall interpretation of results considering objectives, limitations, multiplicity of analyses, results from similar studies, and other relevant evidence | 14-16 |
| Generalisability         | 21 | Discuss the generalisability (external validity) of the study results                                                                                                      | 13    |
| <b>Other information</b> |    |                                                                                                                                                                            |       |
| Funding                  | 22 | Give the source of funding and the role of the funders for the present study and, if applicable, for the original study on which the present article is based              | 15    |

\*Give information separately for exposed and unexposed groups.

**Note:** An Explanation and Elaboration article discusses each checklist item and gives methodological background and published examples of transparent reporting. The STROBE checklist is best used in conjunction with this article (freely available on the Web sites of PLoS Medicine at <http://www.plosmedicine.org/>, Annals of Internal Medicine at <http://www.annals.org/>, and Epidemiology at <http://www.epidem.com/>). Information on the STROBE Initiative is available at [www.strobe-statement.org](http://www.strobe-statement.org).
